# Supplementary material for: High transcript abundance, RNA editing, and small RNAs in intergenic regions within the massive mitochondrial genome of the angiosperm Silene noctiflora
Source: PubMed Central journal article supplement (PMC4647634; doi:10.1186/s12864-015-2155-3), 2015-11-14
Supplement: 12864_2015_2155_MOESM1_ESM.pdf [file 12864_2015_2155_MOESM1_ESM.pdf]

### Figure S1

Correlation between RNA-seq read depths for pairs of biological replicates. Coverage estimates (in terms of average read depth) are based on a sliding window with a window size of 200 bp and a step size of 100 bp. (A) mitochondrial-enriched mRNA-seq libraries; (B) total-cellular mRNA-seq libraries; (C) mitochondrial-enriched small RNA-seq libraries; (D) total-cellular small RNA-seq libraries. The red points represent annotated gene regions, including introns and 2 kb of 5' and 3' flanking sequences. The  $r$ -values represent the Pearson's correlation coefficient as calculated in R. 1:1 lines are shown in blue.

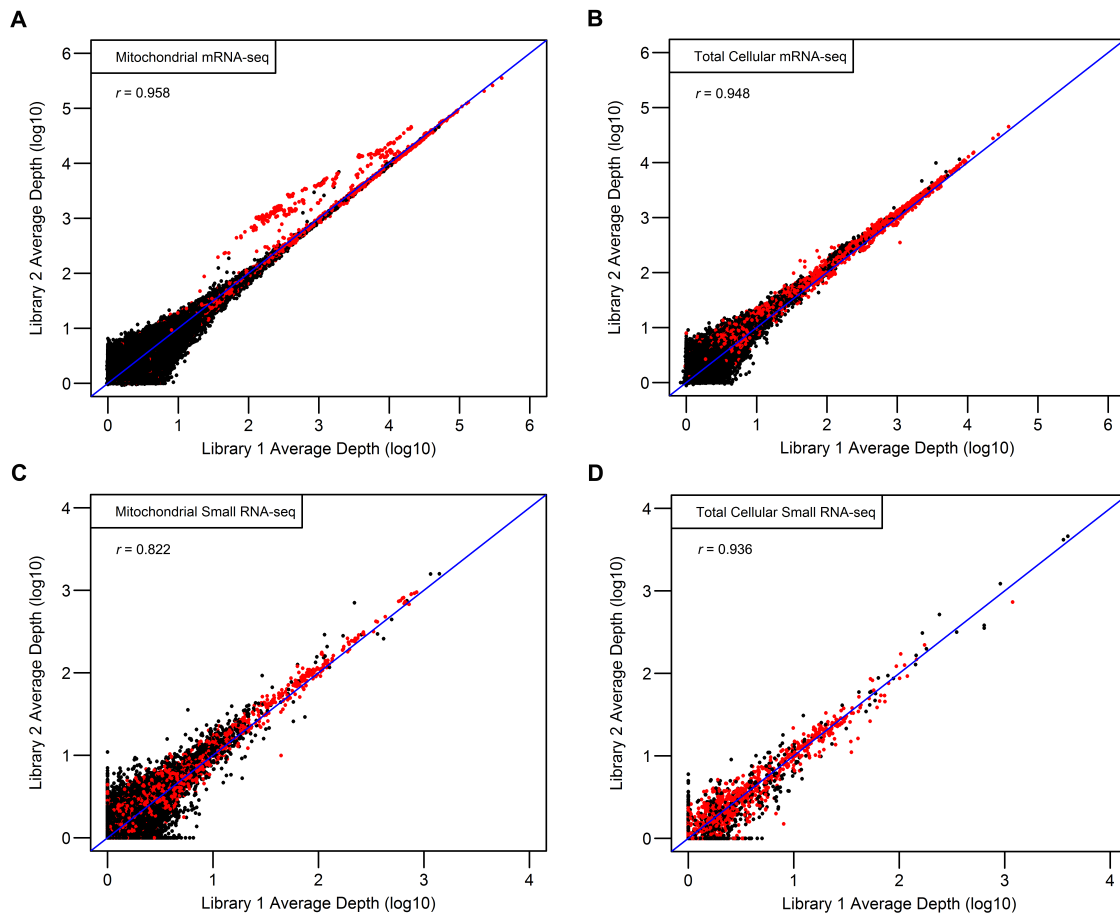

### Figure S2

Illustration of strand specificity in mRNA-seq libraries. Coverage estimates (in terms of average read depth) are based on a sliding window with a window size of 100 bp and a step size 50 bp for the average of two replicates of mitochondrial-enriched libraries. Coverage values for forward and reverse strands were displayed above and below the x-axis, respectively. The pink shading indicates the boundaries of protein-coding genes/exons, and the gray arrows indicate the orientation of the coding strand.

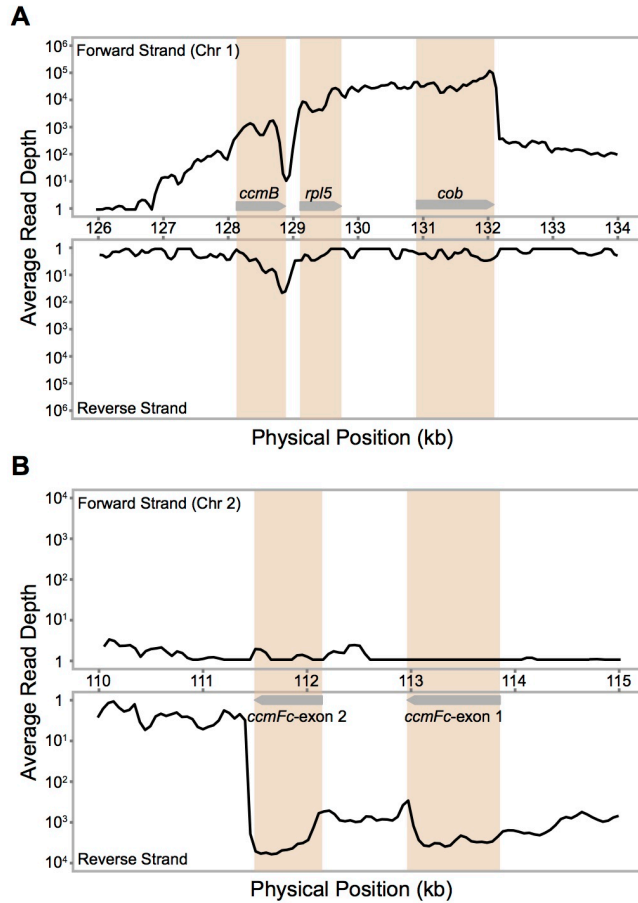

### Figure S3

The decline in mRNA-seq coverage prior to the first in-frame stop codon in *nad6* and *ccmC*. Coverage estimates (in terms of average read depth) are based on a sliding window with a window size of 20 bp and a step size of 10 bp for the average of two replicates of mitochondrial-enriched libraries. The pink shading indicates the boundaries of the protein-coding genes, and the gray arrows indicate the orientation of the coding strand.

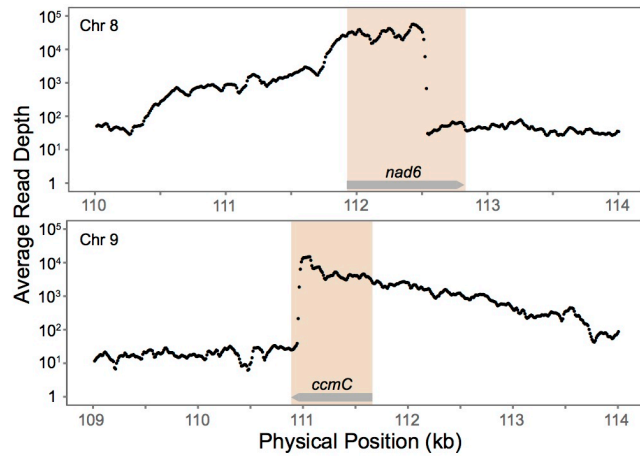



### Figure S5

Examples of pseudogenes containing internal regions that are perfectly identical to the intact copy of the gene and are therefore subject to cross-mapping of reads that originate from the intact gene copy. Coverage estimates (in terms of average read depth) are based on a sliding window with a window size of 100 bp and a step size 50 bp for the average of two replicates of mitochondrial-enriched libraries. The pink shading indicates the boundaries of pseudogenes/exons, and the gray arrows indicate the orientation of the coding strand. Internal regions corresponding to coverage spikes in the (A) *mttB* and (B) *nad2-exon4* pseudogenes are identical to the corresponding functional genes.

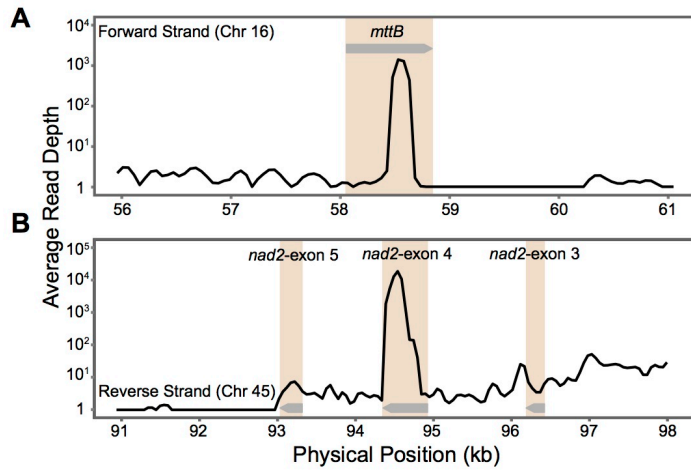

**Figure S6**

The frequency distribution of average mRNA-seq read depth. Read depths are calculated based on 500-bp windows across the entire mitochondrial genome for the average of two replicates of mitochondrial-enriched libraries. The 5% tail of the distribution corresponds to windows with coverage  $>70\times$ . Windows with  $>100\times$  are found in the 4% tail of the distribution.

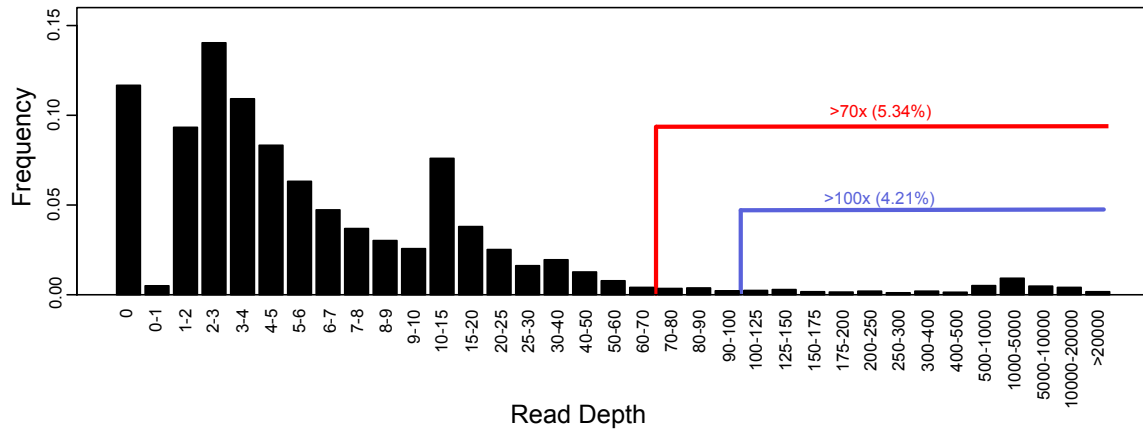

**Figure S7**

Mitochondrial enrichment for mRNA-seq relative to total-cellular libraries across the 63 chromosomes of the *Silene noctiflora* mitochondrial genome. This plot is a duplicate of Figure 1 except that points are color-coded based on their degree of overrepresentation in the mitochondrial-enriched libraries. Red and green points indicate overrepresentation in the mitochondrial-enriched and total-cellular libraries, respectively. Color scaling is based on the ratio of mitochondrial-enriched to total-cellular read depths (in terms of counts per million) expressed on a  $\log_{10}$  scale. Expression values were set to a minimum of 1 for these calculations.

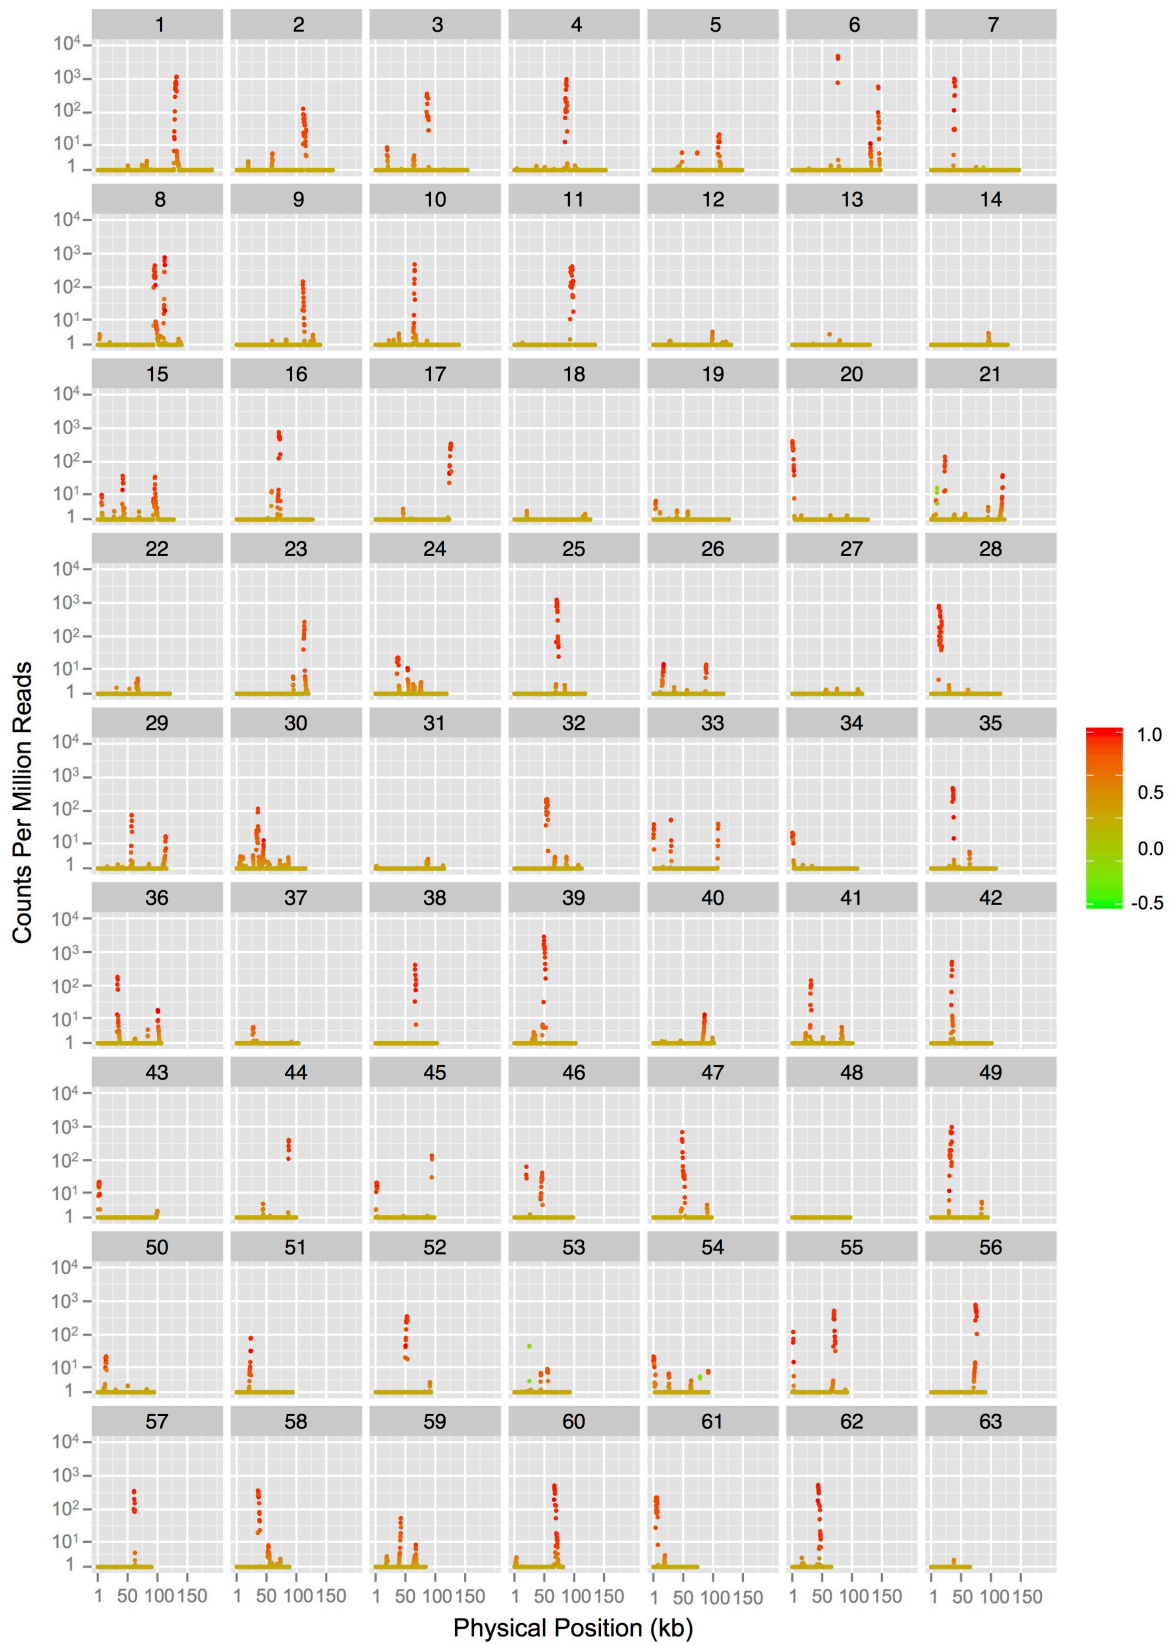



**Figure S8**

Mitochondrial enrichment for small RNA-seq relative to total-cellular libraries across the 63 chromosomes of the *Silene noctiflora* mitochondrial genome. This plot is a duplicate of Figure 3 except that points are color-coded based on their degree of overrepresentation in the mitochondrial-enriched libraries. Red and green points indicate overrepresentation in the mitochondrial-enriched and total-cellular libraries, respectively. Color scaling is based on the ratio of mitochondrial-enriched to total-cellular read depths (in terms of counts per million) expressed on a  $\log_{10}$  scale. Expression values were set to a minimum of 1 for these calculations.

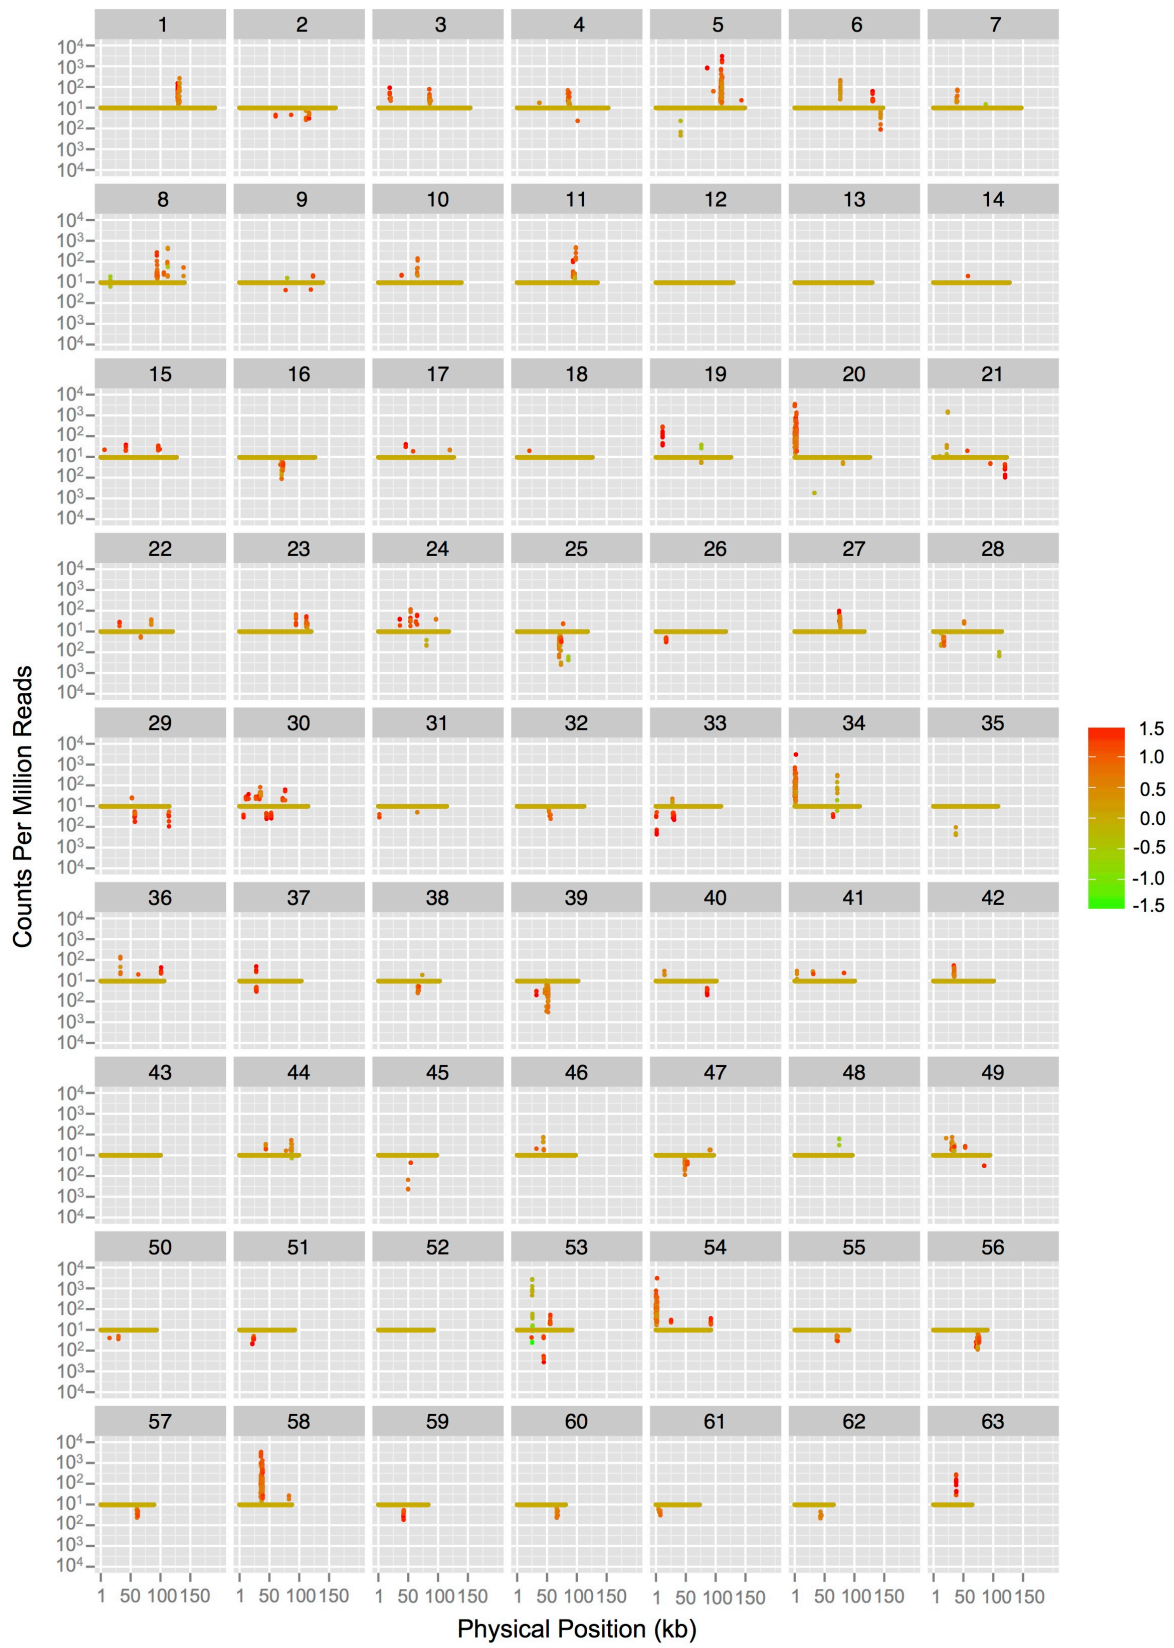

**Figure S9**

Correlation between RNA-seq coverage from mRNA and small-RNA libraries. Coverage estimates (in terms of average read depth) are based on a sliding window with a window size of 200 bp and a step size of 100 bp. Forward and reverse strands within each window were analyzed separately. The red points represent annotated gene regions, including introns and 2 kb of 5' and 3' flanking sequences. The  $r$ -value is the Pearson's correlation coefficient as calculated in R. The 1:1 line is shown in blue.

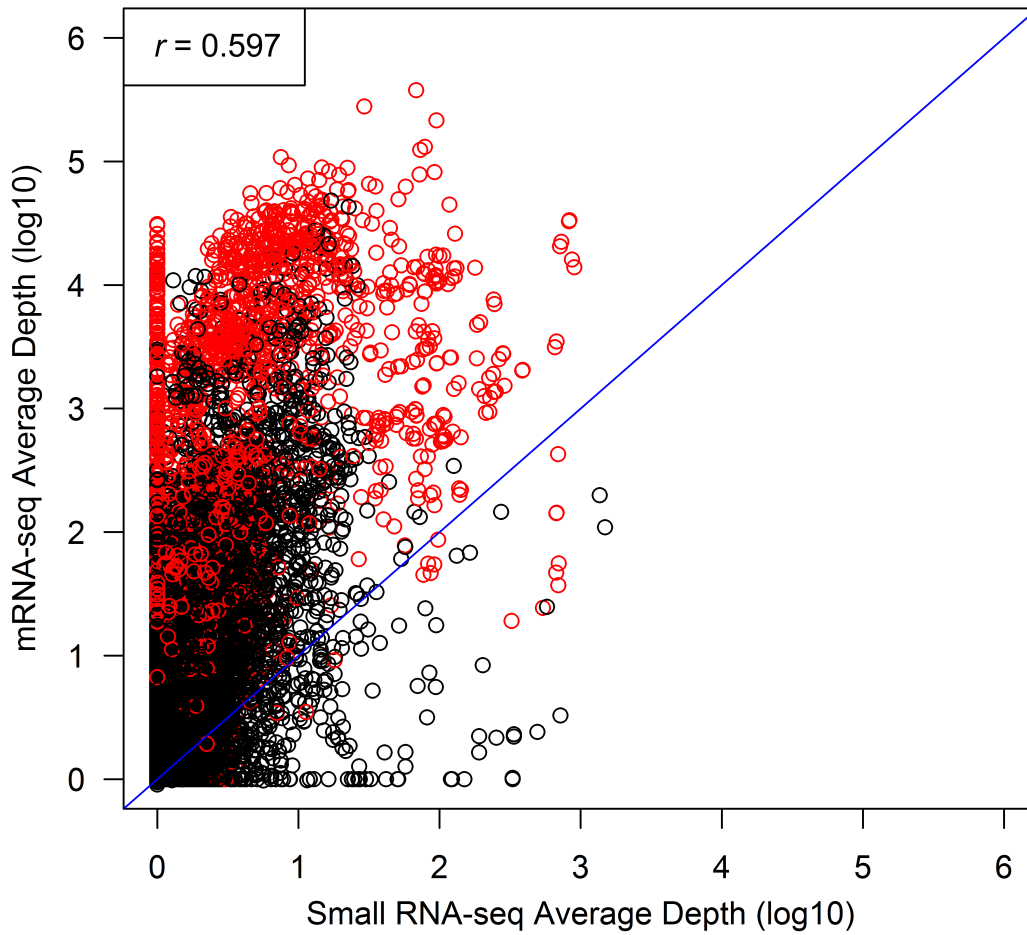

**Table S1.** Summary of average read depth based on raw read counts for each gene

| Chrom | Gene               | Start  | End    | Strand | Length (bp) | Mitochondrial Coverage |        |        | Total Cellular Coverage |       |       | Ratio |
|-------|--------------------|--------|--------|--------|-------------|------------------------|--------|--------|-------------------------|-------|-------|-------|
|       |                    |        |        |        |             | Lib 1                  | Lib 2  | Mean   | Lib 1                   | Lib 2 | Mean  |       |
| 1     | <i>ccmB-a</i>      | 128198 | 128818 | +      | 621         | 1016                   | 980    | 998    | 103                     | 124   | 113   | 8.80  |
| 1     | <i>rpl5-1</i>      | 129131 | 129712 | +      | 582         | 11289                  | 10419  | 10854  | 1195                    | 1416  | 1306  | 8.31  |
| 1     | <i>cob</i>         | 130875 | 132044 | +      | 1170        | 42423                  | 40005  | 41214  | 4449                    | 4800  | 4624  | 8.91  |
| 2     | <i>ccmFc-exon2</i> | 111512 | 112061 | -      | 550         | 4895                   | 4971   | 4933   | 584                     | 615   | 599   | 8.23  |
| 2     | <i>ccmFc-exon1</i> | 112986 | 113752 | -      | 767         | 3325                   | 3407   | 3366   | 456                     | 467   | 461   | 7.30  |
| 3     | <i>nad1-exon2</i>  | 86375  | 86456  | +      | 82          | 9216                   | 7772   | 8494   | 1095                    | 1197  | 1146  | 7.41  |
| 3     | <i>nad1-exon3</i>  | 87835  | 88026  | +      | 192         | 25995                  | 23259  | 24627  | 2998                    | 3204  | 3101  | 7.94  |
| 4     | <i>nad5-exon1</i>  | 85304  | 85533  | +      | 230         | 14953                  | 13304  | 14129  | 1513                    | 1775  | 1644  | 8.60  |
| 4     | <i>nad5-exon2</i>  | 86399  | 87614  | +      | 1216        | 33334                  | 31517  | 32425  | 3588                    | 4084  | 3836  | 8.45  |
| 5     | <i>trnM(CAT)</i>   | 108843 | 108917 | +      | 75          | 273                    | 252    | 263    | 12                      | 20    | 16    | 16.37 |
| 5     | <i>rrn18-a</i>     | 109091 | 110881 | +      | 1791        | 244                    | 1166   | 705    | 80                      | 76    | 78    | 9.05  |
| 5     | <i>rrn5-a</i>      | 111077 | 111194 | +      | 118         | 306                    | 327    | 316    | 65                      | 70    | 67    | 4.69  |
| 6     | <i>atp9</i>        | 76509  | 76733  | +      | 225         | 379607                 | 339348 | 359477 | 36120                   | 42849 | 39484 | 9.10  |
| 6     | <i>nad1-exon5</i>  | 144016 | 144274 | -      | 259         | 36648                  | 34344  | 35496  | 4006                    | 4575  | 4290  | 8.27  |
| 7     | <i>nad5-exon4</i>  | 38470  | 38864  | +      | 395         | 54706                  | 53330  | 54018  | 5670                    | 6406  | 6038  | 8.95  |
| 7     | <i>nad5-exon5</i>  | 39889  | 40044  | +      | 156         | 79211                  | 73720  | 76466  | 7588                    | 8909  | 8249  | 9.27  |
| 8     | <i>nad2-exon1</i>  | 94355  | 94507  | +      | 153         | 17147                  | 14857  | 16002  | 1860                    | 2108  | 1984  | 8.07  |
| 8     | <i>nad2-exon2</i>  | 95484  | 95875  | +      | 392         | 22734                  | 20649  | 21692  | 2543                    | 2891  | 2717  | 7.98  |
| 8     | <i>nad6</i>        | 111927 | 112811 | +      | 885         | 21747                  | 20715  | 21231  | 2132                    | 2086  | 2109  | 10.07 |
| 9     | <i>ccmC</i>        | 110920 | 111654 | -      | 735         | 5523                   | 5478   | 5501   | 724                     | 766   | 745   | 7.38  |
| 10    | <i>nad9</i>        | 65434  | 66012  | +      | 579         | 19091                  | 18461  | 18776  | 2119                    | 2410  | 2264  | 8.29  |
| 11    | <i>nad4-exon1</i>  | 94197  | 94657  | +      | 461         | 13852                  | 13346  | 13599  | 1577                    | 1793  | 1685  | 8.07  |
| 11    | <i>nad4-exon2</i>  | 96212  | 97149  | +      | 938         | 15458                  | 14569  | 15014  | 1698                    | 1935  | 1817  | 8.26  |
| 11    | <i>nad4-exon3</i>  | 98419  | 98507  | +      | 89          | 28525                  | 25300  | 26912  | 2644                    | 3137  | 2891  | 9.31  |
| 16    | <i>cox1-a</i>      | 70929  | 72512  | -      | 1584        | 24656                  | 22876  | 23766  | 2315                    | 2842  | 2578  | 9.22  |
| 17    | <i>rrn26-a</i>     | 123577 | 126684 | -      | 3108        | 5406                   | 12276  | 8841   | 1137                    | 1077  | 1107  | 7.99  |
| 20    | <i>rrn26-b</i>     | 226    | 3333   | +      | 3108        | 5471                   | 12635  | 9053   | 1148                    | 1113  | 1131  | 8.01  |
| 21    | <i>nad5-exon3</i>  | 22965  | 22986  | +      | 22          | 3129                   | 3106   | 3117   | 429                     | 533   | 481   | 6.48  |
| 23    | <i>mttB-1</i>      | 113128 | 113916 | +      | 789         | 9031                   | 8496   | 8764   | 1260                    | 1595  | 1428  | 6.14  |
| 25    | <i>cox3</i>        | 70464  | 71261  | -      | 798         | 49339                  | 44986  | 47162  | 4603                    | 5704  | 5153  | 9.15  |
| 25    | <i>atp8</i>        | 71652  | 72155  | -      | 504         | 28094                  | 25678  | 26886  | 2906                    | 3573  | 3239  | 8.30  |
| 28    | <i>nad7-exon4</i>  | 12793  | 13054  | -      | 262         | 49837                  | 48556  | 49196  | 5213                    | 5844  | 5528  | 8.90  |
| 28    | <i>nad7-exon3</i>  | 14898  | 15608  | -      | 711         | 23235                  | 21765  | 22500  | 2331                    | 2660  | 2496  | 9.02  |
| 28    | <i>nad7-exon2</i>  | 16443  | 16511  | -      | 69          | 1976                   | 1755   | 1866   | 213                     | 293   | 253   | 7.38  |
| 28    | <i>nad7-exon1</i>  | 17338  | 17480  | -      | 143         | 12140                  | 12220  | 12180  | 1377                    | 1502  | 1440  | 8.46  |
| 32    | <i>matR-a</i>      | 52975  | 54972  | -      | 1998        | 6493                   | 6258   | 6375   | 897                     | 1017  | 957   | 6.66  |
| 32    | <i>nad1_exon4</i>  | 56141  | 56199  | -      | 59          | 4442                   | 4183   | 4312   | 573                     | 999   | 786   | 5.49  |
| 34    | <i>rrn18-b</i>     | 229    | 2019   | +      | 1791        | 241                    | 1165   | 703    | 78                      | 75    | 76    | 9.21  |
| 34    | <i>rrn5-b</i>      | 2215   | 2332   | +      | 118         | 314                    | 313    | 313    | 61                      | 74    | 68    | 4.62  |
| 35    | <i>nad1-exon1</i>  | 36866  | 37251  | -      | 386         | 12093                  | 11220  | 11657  | 1186                    | 1395  | 1290  | 9.03  |
| 36    | <i>nad3-a</i>      | 33294  | 33650  | +      | 357         | 7030                   | 6752   | 6891   | 743                     | 740   | 742   | 9.29  |
| 39    | <i>atp6</i>        | 49368  | 50297  | -      | 930         | 75277                  | 74101  | 74689  | 7375                    | 8979  | 8177  | 9.13  |
| 39    | <i>atp1</i>        | 50507  | 52027  | -      | 1521        | 29066                  | 31061  | 30063  | 3456                    | 4093  | 3774  | 7.97  |
| 42    | <i>rps13</i>       | 34852  | 35202  | +      | 351         | 22480                  | 21292  | 21886  | 2383                    | 2622  | 2503  | 8.75  |
| 43    | <i>rrn5-c</i>      | 968    | 1085   | -      | 118         | 316                    | 312    | 314    | 65                      | 71    | 68    | 4.59  |
| 43    | <i>rrn18-c</i>     | 1281   | 3071   | -      | 1791        | 242                    | 1154   | 698    | 81                      | 76    | 78    | 8.90  |
| 43    | <i>trnM(CAT)</i>   | 3245   | 3319   | -      | 75          | 304                    | 243    | 273    | 15                      | 27    | 21    | 13.03 |
| 44    | <i>trnI-CAT</i>    | 55795  | 55868  | +      | 74          | 56                     | 39     | 48     | --                      | --    | --    | --    |
| 45    | <i>rrn5-d</i>      | 874    | 991    | -      | 118         | 333                    | 314    | 324    | 57                      | 60    | 59    | 5.52  |
| 45    | <i>rrn18-d</i>     | 1187   | 2977   | -      | 1791        | 241                    | 1152   | 696    | 77                      | 75    | 76    | 9.16  |
| 46    | <i>ccmFn</i>       | 45188  | 46864  | +      | 1677        | 1273                   | 1296   | 1285   | 188                     | 230   | 209   | 6.15  |
| 49    | <i>trnY-GTA</i>    | 30558  | 30639  | +      | 82          | 213                    | 220    | 216    | 11                      | 19    | 15    | 14.25 |
| 49    | <i>nad2-exon3</i>  | 31145  | 31305  | +      | 161         | 19554                  | 17501  | 18527  | 2124                    | 2451  | 2287  | 8.10  |
| 49    | <i>nad2-exon4</i>  | 32891  | 33463  | +      | 573         | 29865                  | 29156  | 29510  | 3194                    | 3705  | 3450  | 8.55  |

|    |                   |       |       |   |      |       |       |       |      |       |       |      |
|----|-------------------|-------|-------|---|------|-------|-------|-------|------|-------|-------|------|
| 49 | <i>nad2-exon5</i> | 34662 | 34849 | + | 188  | 92370 | 92099 | 92235 | 9733 | 10912 | 10323 | 8.94 |
| 50 | <i>rm5-e</i>      | 12422 | 12539 | - | 118  | 308   | 302   | 305   | 75   | 57    | 66    | 4.62 |
| 50 | <i>rm18-e</i>     | 12735 | 14525 | - | 1791 | 240   | 1167  | 703   | 78   | 77    | 77    | 9.11 |
| 52 | <i>rm26-c</i>     | 50094 | 53201 | - | 3108 | 5364  | 12381 | 8872  | 1128 | 1070  | 1099  | 8.07 |
| 54 | <i>rm18-f</i>     | 228   | 2018  | + | 1791 | 242   | 1162  | 702   | 80   | 77    | 78    | 8.96 |
| 54 | <i>rm5-f</i>      | 2214  | 2331  | + | 118  | 358   | 357   | 357   | 78   | 69    | 73    | 4.87 |
| 54 | <i>trnI-CAT</i>   | 80167 | 80240 | + | 74   | 22    | 16    | 19    | --   | --    | --    | --   |
| 55 | <i>nad3-b</i>     | 1634  | 1990  | - | 357  | 6356  | 6264  | 6310  | 691  | 671   | 681   | 9.27 |
| 55 | <i>cox2</i>       | 69579 | 70355 | - | 777  | 18519 | 17250 | 17884 | 1950 | 2399  | 2174  | 8.23 |
| 56 | <i>cox1-b</i>     | 74308 | 75891 |   | 1584 | 24818 | 22829 | 23823 | 2306 | 2836  | 2571  | 9.27 |
| 58 | <i>rm26-d</i>     | 35817 | 38924 | + | 3108 | 5484  | 12531 | 9008  | 1159 | 1110  | 1134  | 7.94 |
| 59 | <i>trnI-CAT</i>   | 67221 | 67294 | + | 74   | 245   | 217   | 231   | --   | --    | --    | --   |
| 60 | <i>atp4-a</i>     | 67171 | 67875 | - | 705  | 15786 | 15196 | 15491 | 1486 | 1815  | 1651  | 9.38 |
| 60 | <i>nad4L-a</i>    | 67923 | 68225 | - | 303  | 12485 | 11350 | 11917 | 1096 | 1341  | 1219  | 9.78 |
| 60 | <i>ccmB-b</i>     | 70309 | 70929 | - | 621  | 747   | 703   | 725   | 76   | 86    | 81    | 8.94 |
| 61 | <i>matR-b</i>     | 4240  | 6237  | - | 1998 | 6525  | 6223  | 6374  | 912  | 1003  | 957   | 6.66 |
| 61 | <i>nad1-exon4</i> | 6892  | 6950  | - | 59   | 2402  | 2194  | 2298  | 345  | 448   | 396   | 5.80 |
| 61 | <i>nad5-exon3</i> | 39569 | 39590 | - | 22   | 1     | 1     | 1     | 1    | 1     | 1     | --   |
| 62 | <i>atp4-b</i>     | 43681 | 44268 | - | 588  | 16060 | 15578 | 15819 | 1518 | 1807  | 1662  | 9.52 |
| 62 | <i>nad4L-b</i>    | 44443 | 44735 | - | 293  | 12298 | 11409 | 11853 | 1114 | 1375  | 1245  | 9.52 |
| 62 | <i>ccmB-c</i>     | 46819 | 47439 | - | 621  | 762   | 692   | 727   | 69   | 86    | 78    | 9.37 |

**Table S2.** Summary of coverage based on RPKM for each gene

| Chrom | Gene                | Start  | End    | Strand | Length (bp) | Mitochondrial RPKM |        | Total Cellular RPKM |        |
|-------|---------------------|--------|--------|--------|-------------|--------------------|--------|---------------------|--------|
|       |                     |        |        |        |             | Lib 1              | Lib 2  | Lib 1               | Lib 2  |
| 1     | <i>ccmB-a</i>       | 128198 | 128818 | +      | 621         | 1813               | 1783   | 1266                | 1314   |
| 1     | <i>cob</i>          | 130875 | 132044 | +      | 1170        | 25680              | 25208  | 20076               | 17577  |
| 1     | <i>rpl5-1</i>       | 129131 | 129712 | +      | 582         | 13045              | 12692  | 10258               | 9763   |
| 2     | <i>ccmFc</i>        | 111512 | 113752 | -      | 2241        | 1852               | 2011   | 1766                | 1580   |
| 3     | <i>nad1_exon2-3</i> | 86375  | 88026  | +      | 1652        | 5181               | 4949   | 4824                | 4406   |
| 4     | <i>nad5_exon1-2</i> | 85304  | 87614  | +      | 2311        | 15193              | 15122  | 12151               | 11354  |
| 6     | <i>atp9</i>         | 76509  | 76733  | +      | 225         | 243232             | 230507 | 176175              | 170519 |
| 6     | <i>nad1_exon5</i>   | 144016 | 144274 | -      | 259         | 20087              | 19608  | 16931               | 15194  |
| 7     | <i>nad5_exon4-5</i> | 38470  | 40044  | +      | 1575        | 16403              | 16679  | 12693               | 11516  |
| 8     | <i>nad2_exon1-2</i> | 94355  | 95875  | +      | 1521        | 11265              | 10770  | 9425                | 9530   |
| 8     | <i>nad6</i>         | 111927 | 112811 | +      | 885         | 15394              | 15483  | 11516               | 9043   |
| 9     | <i>ccmC</i>         | 110920 | 111654 | -      | 735         | 4004               | 4166   | 3933                | 3395   |
| 10    | <i>nad9</i>         | 65434  | 66012  | +      | 579         | 12017              | 12345  | 10037               | 9487   |
| 11    | <i>nad4</i>         | 94197  | 98507  | +      | 4311        | 5369               | 5354   | 4441                | 4362   |
| 16    | <i>cox1</i>         | 70929  | 72512  | -      | 1584        | 34518              | 33500  | 23713               | 23823  |
| 21    | <i>nad5_exon3</i>   | 22965  | 22986  | +      | 22          | 0                  | 0      | 0                   | 0      |
| 23    | <i>mttB-1</i>       | 113134 | 113916 | +      | 783         | 6062               | 6017   | 6325                | 6635   |
| 25    | <i>atp8</i>         | 71652  | 72155  | -      | 504         | 17520              | 17038  | 14115               | 13698  |
| 25    | <i>cox3</i>         | 70464  | 71261  | -      | 798         | 35428              | 34078  | 24954               | 24963  |
| 28    | <i>nad7</i>         | 12793  | 17480  | -      | 4688        | 6130               | 6175   | 4873                | 4500   |
| 32    | <i>matR-a</i>       | 52975  | 54972  | -      | 1998        | 8846               | 8904   | 9157                | 8382   |
| 32    | <i>nad1_exon4</i>   | 56141  | 56199  | -      | 59          | 0                  | 0      | 0                   | 0      |
| 35    | <i>nad1_exon1</i>   | 36866  | 37251  | -      | 386         | 7958               | 7496   | 5878                | 5623   |
| 36    | <i>nad3-a</i>       | 33294  | 33650  | +      | 357         | 6908               | 6941   | 5863                | 4446   |
| 39    | <i>atp1</i>         | 50507  | 52027  | -      | 1521        | 20089              | 22890  | 17674               | 17172  |
| 39    | <i>atp6</i>         | 49368  | 50297  | -      | 930         | 57870              | 60447  | 42940               | 41979  |
| 42    | <i>rps13</i>        | 34852  | 35202  | +      | 351         | 10921              | 10747  | 8927                | 8004   |
| 46    | <i>ccmFn</i>        | 45188  | 46864  | +      | 1677        | 907                | 992    | 958                 | 970    |
| 49    | <i>nad2_exon3-5</i> | 31145  | 34849  | +      | 3705        | 9539               | 9557   | 7770                | 7518   |
| 55    | <i>cox2</i>         | 69579  | 70355  | -      | 777         | 17946              | 17549  | 14080               | 14144  |
| 60    | <i>atp4-a</i>       | 67171  | 67758  | -      | 588         | 21682              | 22170  | 15217               | 15058  |
| 60    | <i>nad4L-a</i>      | 67923  | 68225  | -      | 303         | 14629              | 14154  | 9709                | 9343   |
| 61    | <i>nad1_exon4</i>   | 6892   | 6950   | -      | 59          | 2                  | 7      | 29                  | 0      |
| 61    | <i>nad5_exon3</i>   | 39569  | 39590  | +      | 22          | 0                  | 0      | 0                   | 0      |

**Table S3.** Summary of ORFs with a minimum length of 201 bp and a minimum average read depth of 100 in the mitochondrial-enriched mRNA-seq libraries.

| Chrom | Start  | End    | Strand | Mean Read Depth |           | Length (bp) | BlastP                           |
|-------|--------|--------|--------|-----------------|-----------|-------------|----------------------------------|
|       |        |        |        | Library 1       | Library 2 |             |                                  |
| 3     | 20517  | 21017  | +      | 150             | 143       | 501         | NADH dehydrogenase subunit 7     |
| 5     | 48135  | 48359  | +      | 412             | 403       | 225         | -                                |
| 5     | 73579  | 73800  | -      | 448             | 402       | 222         | -                                |
| 6     | 130396 | 130677 | +      | 183             | 169       | 282         | -                                |
| 6     | 131782 | 132084 | +      | 154             | 138       | 303         | -                                |
| 8     | 99294  | 99596  | +      | 203             | 170       | 303         | -                                |
| 15    | 6443   | 6715   | +      | 314             | 290       | 273         | -                                |
| 15    | 27836  | 28039  | -      | 154             | 173       | 204         | -                                |
| 15    | 41526  | 41759  | +      | 399             | 377       | 234         | -                                |
| 15    | 42451  | 42810  | +      | 1278            | 1140      | 360         | NADH dehydrogenase subunit 2     |
| 15    | 93838  | 94122  | +      | 237             | 230       | 285         | -                                |
| 15    | 94663  | 94896  | +      | 213             | 183       | 234         | -                                |
| 15    | 95017  | 95226  | +      | 174             | 152       | 210         | -                                |
| 15    | 96791  | 97009  | +      | 265             | 263       | 219         | -                                |
| 15    | 98089  | 98313  | +      | 130             | 105       | 225         | -                                |
| 16    | 58291  | 58818  | +      | 346             | 303       | 528         | mttB                             |
| 19    | 11206  | 11457  | +      | 145             | 166       | 252         | -                                |
| 21    | 8198   | 8425   | +      | 422             | 398       | 228         | -                                |
| 21    | 9977   | 10207  | +      | 803*            | 699*      | 231         | photosystem I P700 apoprotein A1 |
| 21    | 119670 | 119927 | -      | 1710*           | 1516*     | 258         | -                                |
| 22    | 66400  | 66672  | -      | 109             | 112       | 273         | -                                |
| 24    | 36185  | 36571  | +      | 898             | 855       | 387         | ribosomal protein L5             |
| 24    | 54187  | 54402  | +      | 280             | 281       | 216         | -                                |
| 24    | 54475  | 54879  | +      | 163             | 139       | 405         | -                                |
| 26    | 88247  | 88462  | +      | 453             | 513       | 216         | -                                |
| 29    | 55864  | 56082  | -      | 210*            | 171*      | 219         | -                                |
| 29    | 112522 | 112725 | -      | 108             | 103       | 204         | -                                |
| 29    | 113026 | 113256 | -      | 274             | 245       | 231         | -                                |
| 29    | 113833 | 114057 | -      | 678             | 627       | 225         | -                                |
| 29    | 114123 | 114335 | -      | 933             | 862       | 213         | -                                |
| 30    | 34569  | 34913  | +      | 695             | 584       | 345         | -                                |
| 30    | 35484  | 36026  | +      | 4516            | 4246      | 543         | NADH dehydrogenase subunit 2     |
| 30    | 43555  | 43926  | -      | 128             | 121       | 372         | -                                |
| 30    | 44377  | 44598  | -      | 234             | 216       | 222         | -                                |
| 30    | 45214  | 45468  | -      | 607             | 594       | 255         | -                                |
| 32    | 87167  | 87445  | +      | 124             | 128       | 279         | -                                |
| 32    | 107059 | 107310 | -      | 116             | 112       | 252         | -                                |
| 33    | 358    | 708    | -      | 835             | 750       | 351         | -                                |
| 33    | 29653  | 29907  | -      | 1170            | 986       | 255         | -                                |
| 33    | 30251  | 30451  | -      | 231             | 195       | 201         | -                                |
| 36    | 101925 | 102140 | +      | 171             | 159       | 216         | -                                |
| 37    | 26965  | 27177  | -      | 136             | 129       | 213         | -                                |
| 38    | 66657  | 67385  | -      | 4487            | 4419      | 729         | ATPase subunit 6                 |
| 40    | 84633  | 84929  | -      | 168             | 142       | 297         | -                                |
| 40    | 85766  | 85966  | -      | 526             | 459       | 201         | -                                |

|    |       |       |   |        |        |      |                                |
|----|-------|-------|---|--------|--------|------|--------------------------------|
| 41 | 81772 | 82023 | - | 124    | 124    | 252  | -                              |
| 44 | 86758 | 87297 | + | 11959* | 11307* | 540  | cytochrome c oxidase subunit 2 |
| 44 | 87703 | 87909 | + | 140*   | 130*   | 207  | -                              |
| 45 | 94347 | 94790 | - | 6513   | 5992   | 444  | NADH dehydrogenase subunit 2   |
| 47 | 47498 | 47785 | - | 133    | 115    | 288  | -                              |
| 47 | 48353 | 49729 | - | 14286  | 12960  | 1377 | ribosomal protein S3           |
| 47 | 50250 | 50528 | - | 1768   | 1547   | 279  | -                              |
| 47 | 50593 | 50820 | - | 1233   | 1072   | 228  | -                              |
| 47 | 52328 | 52570 | - | 779    | 643    | 243  | -                              |
| 49 | 84844 | 85062 | - | 253    | 230    | 219  | -                              |
| 53 | 55930 | 56151 | + | 486    | 428    | 222  | NADH dehydrogenase subunit 7   |
| 54 | 63317 | 63526 | - | 190    | 175    | 210  | -                              |
| 57 | 61121 | 61849 | - | 4456   | 4338   | 729  | ATPase subunit 6               |
| 58 | 53923 | 54138 | + | 149    | 142    | 216  | -                              |
| 59 | 41368 | 41589 | - | 490    | 427    | 222  | NADH dehydrogenase subunit 7   |
| 59 | 65656 | 65946 | - | 108    | 112    | 291  | -                              |
| 60 | 3277  | 3486  | - | 119    | 126    | 210  | -                              |
| 63 | 38053 | 38304 | + | 151    | 165    | 252  | -                              |

\*Coverage values may be inflated because the ORF overlaps with a region that is duplicated or highly similar to another gene.



**Table S4.** Summary of all identified C-to-U RNA editing sites. Sites labeled as intron/IGS were found adjacent to an exon with a *trans*-spliced intron with unknown boundaries, so it is not clear whether they are in the intron or IGS.

| Chrom | Position | Strand | Gene/Location | Coverage | Edited (%) | Mean Quality |
|-------|----------|--------|---------------|----------|------------|--------------|
| 1     | 128225   | +      | ccmB-a        | 706      | 99.4       | 37.5         |
| 1     | 128267   | +      | ccmB-a        | 564      | 96.8       | 38.2         |
| 1     | 128268   | +      | ccmB-a        | 564      | 96.8       | 38.2         |
| 1     | 128351   | +      | ccmB-a        | 165      | 97.6       | 34.5         |
| 1     | 128357   | +      | ccmB-a        | 212      | 88.7       | 33.6         |
| 1     | 128361   | +      | ccmB-a        | 262      | 95.8       | 33.5         |
| 1     | 128501   | +      | ccmB-a        | 523      | 99.4       | 38.0         |
| 1     | 128664   | +      | ccmB-a        | 898      | 97.2       | 39.0         |
| 1     | 128691   | +      | ccmB-a        | 550      | 97.8       | 35.7         |
| 1     | 128700   | +      | ccmB-a        | 269      | 82.9       | 36.8         |
| 1     | 129165   | +      | rpl5          | 9124     | 92.0       | 37.8         |
| 1     | 129194   | +      | rpl5          | 9213     | 92.8       | 37.7         |
| 1     | 129474   | +      | rpl5          | 3879     | 94.1       | 37.5         |
| 1     | 129660   | +      | rpl5          | 27632    | 90.9       | 37.1         |
| 1     | 131199   | +      | cob           | 31293    | 98.7       | 38.2         |
| 1     | 131232   | +      | cob           | 19165    | 98.9       | 35.7         |
| 1     | 131442   | +      | cob           | 26100    | 99.5       | 39.1         |
| 1     | 131682   | +      | cob           | 8374     | 98.9       | 34.9         |
| 1     | 131782   | +      | cob           | 35816    | 98.3       | 37.6         |
| 1     | 132034   | +      | cob           | 126110   | 99.8       | 39.2         |
| 2     | 111595   | -      | ccmFc         | 6047     | 99.7       | 38.1         |
| 2     | 111669   | -      | ccmFc         | 8243     | 98.1       | 37.0         |
| 2     | 113335   | -      | ccmFc         | 3976     | 99.6       | 36.3         |
| 2     | 113598   | -      | ccmFc         | 3832     | 91.7       | 37.4         |
| 2     | 113602   | -      | ccmFc         | 3745     | 99.2       | 37.0         |
| 2     | 113630   | -      | ccmFc         | 2659     | 87.9       | 38.2         |
| 2     | 113703   | -      | ccmFc         | 3529     | 98.1       | 35.4         |
| 2     | 113819   | -      | 5UTR-ccmFc    | 2148     | 92.5       | 35.9         |
| 2     | 113910   | -      | 5UTR-ccmFc    | 1762     | 20.4       | 37.3         |
| 2     | 114327   | -      | 5UTR-ccmFc    | 1495     | 83.7       | 37.8         |
| 2     | 115766   | -      | IGS           | 502      | 24.3       | 36.5         |
| 2     | 115832   | -      | IGS           | 527      | 95.5       | 36.9         |
| 2     | 115884   | -      | IGS           | 230      | 86.1       | 36.8         |
| 3     | 19664    | +      | IGS           | 336      | 58.3       | 39.0         |
| 3     | 19842    | +      | IGS           | 428      | 68.5       | 38.3         |
| 3     | 87856    | +      | nad1-3        | 10633    | 95.6       | 36.2         |
| 3     | 87866    | +      | nad1-3        | 15401    | 89.8       | 36.2         |
| 3     | 87902    | +      | nad1-3        | 30676    | 94.5       | 36.5         |

|   |        |   |                   |        |      |      |
|---|--------|---|-------------------|--------|------|------|
| 3 | 88465  | + | intron/IGS-nad1-3 | 2914   | 88.6 | 36.6 |
| 4 | 85458  | + | nad5-1            | 10696  | 97.1 | 36.6 |
| 4 | 86410  | + | nad5-2            | 19807  | 98.9 | 37.3 |
| 4 | 86542  | + | nad5-2            | 24318  | 99.4 | 38.3 |
| 4 | 86566  | + | nad5-2            | 33424  | 99.5 | 36.6 |
| 4 | 86716  | + | nad5-2            | 21415  | 97.5 | 36.8 |
| 4 | 86721  | + | nad5-2            | 23496  | 96.9 | 36.6 |
| 4 | 86776  | + | nad5-2            | 26054  | 99.5 | 38.2 |
| 4 | 86893  | + | nad5-2            | 30369  | 98.8 | 33.8 |
| 4 | 87003  | + | nad5-2            | 37968  | 99.6 | 35.6 |
| 4 | 87478  | + | nad5-2            | 65369  | 99.6 | 36.2 |
| 4 | 87896  | + | intron/IGS-nad5-2 | 7864   | 66.7 | 36.8 |
| 5 | 73794  | - | IGS               | 191    | 78.0 | 35.5 |
| 6 | 76528  | + | atp9              | 226140 | 99.0 | 35.9 |
| 6 | 144066 | - | nad1-5            | 53836  | 99.2 | 36.7 |
| 6 | 144096 | - | nad1-5            | 30260  | 99.2 | 37.1 |
| 6 | 144251 | - | nad1-5            | 10431  | 98.0 | 34.9 |
| 6 | 144786 | - | intron/IGS-nad1-5 | 2017   | 90.2 | 35.5 |
| 7 | 38551  | + | nad5-4            | 54499  | 97.7 | 36.8 |
| 7 | 38581  | + | nad5-4            | 92780  | 99.4 | 36.2 |
| 7 | 38611  | + | nad5-4            | 71512  | 99.7 | 37.7 |
| 7 | 39920  | + | nad5-5            | 41655  | 98.8 | 37.0 |
| 7 | 39983  | + | nad5-5            | 69836  | 99.4 | 37.2 |
| 8 | 94276  | + | 5UTR-nad2         | 18527  | 34.0 | 37.0 |
| 8 | 94380  | + | nad2-1            | 29476  | 93.7 | 37.9 |
| 8 | 95686  | + | nad2-2            | 8556   | 98.1 | 37.5 |
| 8 | 95691  | + | nad2-2            | 8508   | 98.2 | 37.1 |
| 8 | 95724  | + | nad2-2            | 9708   | 96.8 | 35.6 |
| 8 | 95758  | + | nad2-2            | 22091  | 98.4 | 36.3 |
| 8 | 95827  | + | nad2-2            | 23403  | 97.8 | 39.0 |
| 8 | 111845 | + | 5UTR-nad6         | 20630  | 94.8 | 36.2 |
| 8 | 112014 | + | nad6              | 41731  | 90.9 | 36.8 |
| 8 | 112015 | + | nad6              | 41731  | 90.9 | 36.8 |
| 8 | 112021 | + | nad6              | 40101  | 85.6 | 36.4 |
| 8 | 112072 | + | nad6              | 27070  | 99.6 | 38.5 |
| 8 | 112117 | + | nad6              | 12981  | 99.3 | 37.0 |
| 8 | 112495 | + | nad6              | 38230  | 99.8 | 38.6 |
| 9 | 111015 | - | ccmC              | 14144  | 99.8 | 39.2 |
| 9 | 111038 | - | ccmC              | 14765  | 99.4 | 38.5 |
| 9 | 111074 | - | ccmC              | 8482   | 97.7 | 36.5 |
| 9 | 111112 | - | ccmC              | 7311   | 58.9 | 39.0 |
| 9 | 111189 | - | ccmC              | 4161   | 97.4 | 37.1 |
| 9 | 111214 | - | ccmC              | 3255   | 28.6 | 38.0 |

|    |        |   |                   |       |      |      |
|----|--------|---|-------------------|-------|------|------|
| 9  | 111215 | - | ccmC              | 3255  | 70.1 | 37.6 |
| 9  | 111221 | - | ccmC              | 3284  | 98.3 | 37.7 |
| 9  | 111225 | - | ccmC              | 3896  | 98.6 | 37.5 |
| 9  | 111230 | - | ccmC              | 4074  | 98.5 | 37.6 |
| 9  | 111237 | - | ccmC              | 3815  | 98.3 | 38.3 |
| 9  | 111242 | - | ccmC              | 3725  | 99.3 | 38.5 |
| 9  | 111293 | - | ccmC              | 5003  | 99.0 | 37.3 |
| 9  | 111357 | - | ccmC              | 3271  | 98.1 | 36.1 |
| 9  | 111504 | - | ccmC              | 3977  | 98.4 | 37.3 |
| 9  | 111585 | - | ccmC              | 4296  | 91.3 | 38.0 |
| 9  | 111715 | - | 5UTR-ccmC         | 2582  | 40.0 | 38.0 |
| 9  | 111892 | - | 5UTR-ccmC         | 2419  | 22.8 | 38.4 |
| 9  | 112186 | - | 5UTR-ccmC         | 1751  | 80.4 | 36.0 |
| 9  | 112543 | - | 5UTR-ccmC         | 838   | 41.9 | 37.2 |
| 10 | 65340  | + | 5UTR-nad9         | 5769  | 33.0 | 37.2 |
| 10 | 65731  | + | nad9              | 21147 | 99.0 | 35.6 |
| 11 | 94270  | + | nad4-1            | 11376 | 96.8 | 38.3 |
| 11 | 94303  | + | nad4-1            | 16521 | 95.9 | 37.2 |
| 11 | 94354  | + | nad4-1            | 17231 | 96.4 | 37.6 |
| 11 | 94393  | + | nad4-1            | 15488 | 98.6 | 38.1 |
| 11 | 94564  | + | nad4-1            | 11174 | 98.1 | 38.2 |
| 11 | 94629  | + | nad4-1            | 6029  | 87.2 | 37.8 |
| 11 | 94633  | + | nad4-1            | 5933  | 97.4 | 36.6 |
| 11 | 96760  | + | nad4-2            | 16081 | 98.3 | 36.6 |
| 11 | 97105  | + | nad4-2            | 5321  | 98.7 | 39.1 |
| 11 | 97573  | + | intron-nad4       | 2777  | 25.7 | 38.4 |
| 11 | 97708  | + | intron-nad4       | 1918  | 92.5 | 37.8 |
| 11 | 98436  | + | nad4-3            | 29316 | 99.0 | 37.1 |
| 11 | 98452  | + | nad4-3            | 29492 | 99.2 | 39.2 |
| 15 | 42079  | + | nad2-pseudo       | 5715  | 90.9 | 34.3 |
| 15 | 42671  | + | nad2-pseudo       | 3822  | 97.1 | 38.6 |
| 15 | 42676  | + | nad2-pseudo       | 3816  | 97.0 | 39.0 |
| 15 | 42709  | + | nad2-pseudo       | 919   | 89.9 | 36.7 |
| 16 | 58517  | + | mttb-pseudo       | 1651  | 96.9 | 39.2 |
| 16 | 58525  | + | mttb-pseudo       | 1648  | 94.8 | 39.3 |
| 19 | 4132   | + | IGS               | 319   | 33.2 | 36.5 |
| 19 | 4323   | + | IGS               | 617   | 31.3 | 38.6 |
| 21 | 22674  | + | intron/IGS-nad5-3 | 2032  | 43.4 | 37.2 |
| 21 | 22785  | + | intron/IGS-nad5-3 | 1654  | 81.5 | 37.1 |
| 23 | 112715 | + | 5UTR-mttB         | 3515  | 47.6 | 36.7 |
| 23 | 112770 | + | 5UTR-mttB         | 4991  | 25.1 | 36.9 |
| 23 | 113221 | + | mttB              | 4634  | 92.4 | 37.8 |
| 23 | 113257 | + | mttB              | 6540  | 91.5 | 38.0 |

|    |        |   |               |       |      |      |
|----|--------|---|---------------|-------|------|------|
| 23 | 113288 | + | mttB          | 7884  | 94.9 | 38.2 |
| 23 | 113419 | + | mttB          | 7037  | 95.0 | 35.7 |
| 23 | 113536 | + | mttB          | 10774 | 77.7 | 38.1 |
| 23 | 113564 | + | mttB          | 11805 | 96.3 | 38.6 |
| 23 | 113654 | + | mttB          | 6393  | 96.5 | 37.6 |
| 23 | 113662 | + | mttB          | 5107  | 94.3 | 37.2 |
| 23 | 113767 | + | mttB          | 14684 | 97.5 | 37.5 |
| 23 | 113870 | + | mttB          | 10718 | 98.5 | 37.3 |
| 24 | 36129  | + | rpl5-pseudo   | 756   | 21.6 | 37.0 |
| 24 | 36438  | + | rpl5-pseudo   | 554   | 53.4 | 37.9 |
| 24 | 36614  | + | rpl5-pseudo   | 1131  | 52.3 | 38.0 |
| 25 | 70948  | - | cox3          | 46307 | 98.4 | 36.4 |
| 25 | 71370  | - | UTR-cox3-atp8 | 47824 | 37.2 | 38.1 |
| 25 | 71684  | - | atp8          | 42085 | 43.3 | 37.7 |
| 25 | 72109  | - | atp8          | 15728 | 96.5 | 36.7 |
| 26 | 88065  | + | IGS           | 547   | 78.2 | 38.9 |
| 26 | 88474  | + | IGS           | 435   | 33.1 | 36.7 |
| 26 | 88698  | + | IGS           | 628   | 67.7 | 37.1 |
| 28 | 12812  | - | nad7-4        | 82769 | 99.8 | 38.5 |
| 28 | 12875  | - | nad7-4        | 44787 | 99.6 | 37.3 |
| 28 | 12890  | - | nad7-4        | 42614 | 99.7 | 37.8 |
| 28 | 13015  | - | nad7-4        | 24931 | 97.8 | 37.2 |
| 28 | 13448  | - | intron-nad7   | 5285  | 29.8 | 38.1 |
| 28 | 13533  | - | intron-nad7   | 3941  | 31.9 | 35.2 |
| 28 | 14025  | - | intron-nad7   | 3283  | 84.4 | 36.9 |
| 28 | 15243  | - | nad7-3        | 22851 | 98.4 | 34.8 |
| 28 | 15274  | - | nad7-3        | 16346 | 99.1 | 37.3 |
| 28 | 15570  | - | nad7-3        | 22927 | 98.9 | 34.5 |
| 28 | 17404  | - | nad7-1        | 11965 | 93.6 | 38.3 |
| 28 | 17443  | - | nad7-1        | 18289 | 92.2 | 36.2 |
| 28 | 17659  | - | 5UTR-nad7     | 16619 | 51.4 | 38.9 |
| 30 | 35023  | + | nad2-pseudo   | 529   | 22.1 | 39.1 |
| 30 | 35677  | + | nad2-pseudo   | 8419  | 98.2 | 37.5 |
| 30 | 35682  | + | nad2-pseudo   | 8373  | 98.3 | 37.1 |
| 30 | 35715  | + | nad2-pseudo   | 9679  | 97.0 | 35.6 |
| 30 | 35749  | + | nad2-pseudo   | 9024  | 98.2 | 38.9 |
| 30 | 35818  | + | nad2-pseudo   | 488   | 78.7 | 39.1 |
| 32 | 53108  | - | matR-a        | 11802 | 87.2 | 36.8 |
| 32 | 53149  | - | matR-a        | 9387  | 22.1 | 37.2 |
| 32 | 53234  | - | matR-a        | 7492  | 99.1 | 36.9 |
| 32 | 53755  | - | matR-a        | 4574  | 60.1 | 38.0 |
| 32 | 54058  | - | matR-a        | 3155  | 23.9 | 36.1 |
| 32 | 54653  | - | matR-a        | 2628  | 96.0 | 37.6 |

|    |        |   |                   |        |      |      |
|----|--------|---|-------------------|--------|------|------|
| 32 | 54786  | - | matR-a            | 13973  | 99.1 | 36.5 |
| 32 | 54947  | - | matR-a            | 5453   | 61.6 | 36.8 |
| 32 | 55672  | - | nad1-4            | 1957   | 23.6 | 34.2 |
| 32 | 56121  | - | intron/IGS-nad1-4 | 2865   | 30.0 | 37.8 |
| 32 | 56239  | - | intron/IGS-nad1-4 | 3390   | 52.1 | 36.0 |
| 33 | 71     | - | IGS               | 742    | 39.0 | 38.2 |
| 33 | 29863  | - | IGS               | 645    | 40.2 | 39.7 |
| 33 | 107948 | - | IGS               | 396    | 25.3 | 38.3 |
| 33 | 108157 | - | IGS               | 620    | 20.7 | 36.8 |
| 33 | 108431 | - | IGS               | 638    | 24.9 | 36.4 |
| 35 | 36945  | - | nad1-1            | 16693  | 85.9 | 38.0 |
| 35 | 36987  | - | nad1-1            | 14316  | 98.3 | 36.8 |
| 35 | 37250  | - | nad1-1            | 14939  | 66.2 | 38.3 |
| 35 | 37404  | - | 5UTR-nad1-1       | 16994  | 31.3 | 36.2 |
| 36 | 33354  | + | nad3-a            | 6388   | 71.3 | 37.6 |
| 36 | 33355  | + | nad3-a            | 6388   | 23.0 | 37.3 |
| 36 | 33501  | + | nad3-a            | 5325   | 95.4 | 38.2 |
| 36 | 33508  | + | nad3-a            | 5207   | 89.3 | 38.7 |
| 36 | 33642  | + | nad3-a            | 7891   | 95.5 | 39.4 |
| 38 | 66220  | - | atp6-pseudo       | 2038   | 76.4 | 38.6 |
| 38 | 66274  | - | atp6-pseudo       | 38730  | 99.7 | 39.6 |
| 38 | 66411  | - | atp6-pseudo       | 9151   | 99.8 | 36.5 |
| 38 | 66475  | - | atp6-pseudo       | 6720   | 99.1 | 37.8 |
| 38 | 66478  | - | atp6-pseudo       | 6746   | 99.4 | 38.1 |
| 38 | 66537  | - | atp6-pseudo       | 10741  | 99.4 | 37.2 |
| 38 | 66667  | - | IGS               | 12000  | 99.6 | 38.6 |
| 38 | 67482  | - | IGS               | 11566  | 84.3 | 37.0 |
| 38 | 67559  | - | IGS               | 5923   | 95.3 | 38.8 |
| 38 | 67574  | - | IGS               | 5998   | 95.3 | 37.1 |
| 39 | 49370  | - | atp6              | 112502 | 99.8 | 39.4 |
| 39 | 49424  | - | atp6              | 137427 | 99.0 | 36.8 |
| 39 | 49561  | - | atp6              | 54413  | 99.8 | 38.3 |
| 39 | 49625  | - | atp6              | 115223 | 99.5 | 38.3 |
| 39 | 49628  | - | atp6              | 115192 | 99.7 | 38.5 |
| 39 | 49972  | - | atp6              | 95611  | 99.6 | 37.9 |
| 39 | 50051  | - | atp6              | 52075  | 98.9 | 35.7 |
| 39 | 50849  | - | atp1              | 38708  | 30.6 | 36.6 |
| 41 | 30934  | + | IGS               | 5152   | 56.5 | 37.1 |
| 41 | 31045  | + | IGS               | 3813   | 83.8 | 37.7 |
| 42 | 33886  | + | 5UTR-rps13        | 3483   | 22.5 | 38.6 |
| 42 | 34519  | + | 5UTR-rps13        | 19914  | 29.7 | 37.9 |
| 42 | 35465  | + | 3UTR-rps13        | 330    | 39.4 | 37.8 |
| 42 | 35856  | + | 3UTR-rps13        | 474    | 71.3 | 38.0 |

|    |       |   |             |        |      |      |
|----|-------|---|-------------|--------|------|------|
| 42 | 35871 | + | 3UTR-rps13  | 463    | 70.0 | 37.6 |
| 42 | 35934 | + | 3UTR-rps13  | 339    | 54.0 | 36.3 |
| 45 | 94414 | - | nad2-pseudo | 836    | 99.0 | 33.3 |
| 45 | 94534 | - | nad2-pseudo | 22249  | 99.8 | 39.3 |
| 45 | 94603 | - | nad2-pseudo | 10371  | 99.0 | 34.2 |
| 46 | 19783 | - | IGS         | 1722   | 33.1 | 38.7 |
| 46 | 45056 | + | 5UTR-ccmFn  | 615    | 21.5 | 37.3 |
| 46 | 45240 | + | ccmFn       | 1114   | 97.3 | 38.5 |
| 46 | 45285 | + | ccmFn       | 589    | 91.7 | 35.4 |
| 46 | 45443 | + | ccmFn       | 951    | 98.1 | 37.2 |
| 46 | 45666 | + | ccmFn       | 1626   | 41.2 | 36.8 |
| 46 | 45843 | + | ccmFn       | 1677   | 98.0 | 36.6 |
| 46 | 45912 | + | ccmFn       | 936    | 99.4 | 36.5 |
| 46 | 45939 | + | ccmFn       | 439    | 99.5 | 33.4 |
| 46 | 46134 | + | ccmFn       | 1255   | 21.7 | 37.5 |
| 46 | 46409 | + | ccmFn       | 780    | 99.6 | 38.4 |
| 46 | 46437 | + | ccmFn       | 660    | 98.8 | 36.8 |
| 46 | 46454 | + | ccmFn       | 547    | 98.5 | 35.7 |
| 46 | 46469 | + | ccmFn       | 679    | 98.5 | 35.3 |
| 46 | 46487 | + | ccmFn       | 829    | 98.9 | 37.6 |
| 46 | 46520 | + | ccmFn       | 1146   | 95.2 | 38.0 |
| 46 | 46531 | + | ccmFn       | 1249   | 26.3 | 37.1 |
| 46 | 46538 | + | ccmFn       | 1223   | 98.5 | 38.3 |
| 46 | 46712 | + | ccmFn       | 1651   | 70.6 | 37.3 |
| 47 | 48627 | - | rps3        | 14592  | 98.9 | 38.0 |
| 47 | 48654 | - | rps3        | 9329   | 98.3 | 36.6 |
| 47 | 49248 | - | rps3        | 6181   | 26.8 | 35.1 |
| 47 | 49296 | - | rps3        | 4139   | 97.3 | 36.8 |
| 47 | 51315 | - | 5UTR-rps3   | 1236   | 68.3 | 38.3 |
| 47 | 52264 | - | IGS         | 1212   | 39.7 | 38.4 |
| 47 | 52595 | - | IGS         | 289    | 39.5 | 38.0 |
| 49 | 31208 | + | nad2-3      | 24657  | 31.0 | 37.6 |
| 49 | 33112 | + | nad2-4      | 42441  | 99.5 | 38.7 |
| 49 | 33142 | + | nad2-4      | 45968  | 99.5 | 38.7 |
| 49 | 33146 | + | nad2-4      | 50364  | 98.9 | 38.1 |
| 49 | 33212 | + | nad2-4      | 28309  | 90.7 | 38.4 |
| 49 | 33242 | + | nad2-4      | 34939  | 99.4 | 36.1 |
| 49 | 33311 | + | nad2-4      | 24403  | 99.8 | 38.9 |
| 49 | 33431 | + | nad2-4      | 3982   | 82.9 | 37.0 |
| 49 | 34782 | + | nad2-5      | 154508 | 98.5 | 36.2 |
| 49 | 34785 | + | nad2-5      | 160482 | 99.0 | 35.2 |
| 49 | 34790 | + | nad2-5      | 155520 | 96.2 | 35.5 |
| 54 | 3422  | + | UTR-rrn5    | 202    | 62.9 | 37.2 |

|    |       |   |                    |       |       |      |
|----|-------|---|--------------------|-------|-------|------|
| 54 | 3492  | + | UTR-rrn5           | 248   | 50.8  | 36.0 |
| 55 | 1642  | - | nad3-b             | 7667  | 97.3  | 39.4 |
| 55 | 1776  | - | nad3-b             | 4872  | 89.3  | 38.8 |
| 55 | 1783  | - | nad3-b             | 5028  | 95.5  | 38.3 |
| 55 | 1929  | - | nad3-b             | 6352  | 23.7  | 37.3 |
| 55 | 1930  | - | nad3-b             | 6352  | 71.0  | 37.7 |
| 55 | 70100 | - | cox2               | 34143 | 99.2  | 37.5 |
| 55 | 70192 | - | cox2               | 27276 | 98.7  | 37.0 |
| 55 | 71541 | - | 5UTR-cox2          | 4273  | 79.9  | 38.2 |
| 57 | 60684 | - | atp6-pseudo        | 1574  | 98.3  | 38.6 |
| 57 | 60738 | - | atp6-pseudo        | 38878 | 99.7  | 39.6 |
| 57 | 60875 | - | atp6-pseudo        | 9119  | 99.7  | 36.5 |
| 57 | 60939 | - | atp6-pseudo        | 6550  | 99.1  | 37.7 |
| 57 | 60942 | - | atp6-pseudo        | 6568  | 99.5  | 38.1 |
| 57 | 61001 | - | atp6-pseudo        | 10809 | 99.4  | 37.3 |
| 57 | 61131 | - | IGS                | 12088 | 99.6  | 38.6 |
| 57 | 61946 | - | IGS                | 11426 | 84.2  | 37.0 |
| 57 | 62023 | - | IGS                | 5956  | 95.6  | 38.7 |
| 57 | 62038 | - | IGS                | 5996  | 95.6  | 37.1 |
| 60 | 66673 | - | 3UTR-atp4-a        | 30489 | 50.7  | 37.8 |
| 60 | 67379 | - | atp4               | 25399 | 99.4  | 36.5 |
| 60 | 67535 | - | atp4               | 12301 | 99.6  | 37.7 |
| 60 | 67559 | - | atp4               | 15773 | 99.6  | 36.7 |
| 60 | 67571 | - | atp4               | 18399 | 99.7  | 37.4 |
| 60 | 67697 | - | atp4               | 14692 | 99.7  | 38.4 |
| 60 | 67752 | - | atp4               | 11772 | 81.3  | 36.8 |
| 60 | 67944 | - | nad4L-a            | 8746  | 98.9  | 38.2 |
| 60 | 68095 | - | nad4L-a            | 9427  | 99.4  | 38.1 |
| 60 | 68116 | - | nad4L-a            | 8532  | 98.9  | 38.0 |
| 60 | 68131 | - | nad4L-a            | 8840  | 99.5  | 38.5 |
| 60 | 68179 | - | nad4L-a            | 6910  | 99.6  | 39.1 |
| 60 | 68224 | - | nad4L-a            | 3494  | 89.0  | 38.2 |
| 60 | 69653 | - | UTR-nad4L-a-ccmB-b | 4237  | 89.3  | 37.5 |
| 60 | 69933 | - | UTR-nad4L-a-ccmB-b | 6464  | 81.0  | 37.2 |
| 60 | 69962 | - | UTR-nad4L-a-ccmB-b | 6276  | 79.1  | 37.8 |
| 60 | 70427 | - | ccmB-b             | 131   | 84.7  | 36.8 |
| 60 | 70436 | - | ccmB-b             | 295   | 96.6  | 35.7 |
| 60 | 70463 | - | ccmB-b             | 726   | 96.3  | 38.9 |
| 60 | 70626 | - | ccmB-b             | 647   | 98.9  | 38.2 |
| 60 | 70766 | - | ccmB-b             | 180   | 88.3  | 33.6 |
| 60 | 70770 | - | ccmB-b             | 130   | 83.1  | 34.0 |
| 60 | 70781 | - | ccmB-b             | 382   | 100.0 | 37.4 |
| 60 | 70859 | - | ccmB-b             | 274   | 92.3  | 38.8 |

|    |       |   |                    |       |      |      |
|----|-------|---|--------------------|-------|------|------|
| 60 | 70860 | - | ccmB-b             | 274   | 92.3 | 38.8 |
| 60 | 70902 | - | ccmB-b             | 482   | 97.7 | 38.0 |
| 60 | 71821 | - | 5UTR-ccmB-b        | 310   | 94.2 | 37.3 |
| 60 | 72095 | - | 5UTR-ccmB-b        | 295   | 50.2 | 37.5 |
| 61 | 4373  | - | matR-b             | 11881 | 86.8 | 36.8 |
| 61 | 4414  | - | matR-b             | 9532  | 22.1 | 37.4 |
| 61 | 4499  | - | matR-b             | 7509  | 98.9 | 36.9 |
| 61 | 5020  | - | matR-b             | 4464  | 60.9 | 37.8 |
| 61 | 5323  | - | matR-b             | 3161  | 23.0 | 36.2 |
| 61 | 5918  | - | matR-b             | 2719  | 96.1 | 37.8 |
| 61 | 6051  | - | matR-b             | 13778 | 99.2 | 36.4 |
| 61 | 6212  | - | matR-b             | 5399  | 63.6 | 36.6 |
| 61 | 6937  | - | nad1-4             | 1887  | 24.5 | 34.5 |
| 61 | 7386  | - | intron/IGS-nad1-4  | 2917  | 30.6 | 37.5 |
| 61 | 7504  | - | intron/IGS-nad1-4  | 3348  | 52.2 | 36.1 |
| 62 | 43183 | - | 3UTR-atp4-b        | 30577 | 50.6 | 37.8 |
| 62 | 43889 | - | atp4-b             | 25461 | 99.3 | 36.5 |
| 62 | 44045 | - | atp4-b             | 12091 | 99.6 | 37.7 |
| 62 | 44069 | - | atp4-b             | 15741 | 99.7 | 36.7 |
| 62 | 44081 | - | atp4-b             | 18443 | 99.8 | 37.4 |
| 62 | 44207 | - | atp4-b             | 14643 | 99.8 | 38.4 |
| 62 | 44262 | - | atp4-b             | 11757 | 80.6 | 36.8 |
| 62 | 44454 | - | nad4L-b            | 8678  | 98.9 | 38.1 |
| 62 | 44605 | - | nad4L-b            | 9326  | 99.3 | 38.1 |
| 62 | 44626 | - | nad4L-b            | 8478  | 99.2 | 38.0 |
| 62 | 44641 | - | nad4L-b            | 8794  | 99.6 | 38.5 |
| 62 | 44689 | - | nad4L-b            | 6912  | 99.6 | 39.2 |
| 62 | 44734 | - | nad4L-b            | 3544  | 88.3 | 38.2 |
| 62 | 46163 | - | UTR-nad4L-b-ccmB-c | 4431  | 89.4 | 37.5 |
| 62 | 46443 | - | UTR-nad4L-b-ccmB-c | 6381  | 80.2 | 37.1 |
| 62 | 46472 | - | UTR-nad4L-b-ccmB-c | 6127  | 78.4 | 37.8 |
| 62 | 46937 | - | ccmB-c             | 147   | 73.5 | 37.0 |
| 62 | 46946 | - | ccmB-c             | 308   | 95.5 | 35.6 |
| 62 | 46973 | - | ccmB-c             | 751   | 95.1 | 38.8 |
| 62 | 47136 | - | ccmB-c             | 579   | 98.6 | 38.3 |
| 62 | 47276 | - | ccmB-c             | 202   | 92.6 | 33.7 |
| 62 | 47280 | - | ccmB-c             | 151   | 88.1 | 33.7 |
| 62 | 47286 | - | ccmB-c             | 119   | 91.6 | 34.6 |
| 62 | 47369 | - | ccmB-c             | 283   | 90.1 | 38.5 |
| 62 | 47370 | - | ccmB-c             | 283   | 90.1 | 38.5 |
| 62 | 47412 | - | ccmB-c             | 500   | 98.2 | 37.9 |

---



**Table S5.** Summary of non-canonical (i.e., other C-to-U) editing sites identified by the CLC algorithm. Sites labeled as Intron/IGS were found adjacent to an exon with a *trans*-spliced intron with unknown boundaries, so it is not clear whether they are in the intron or IGS. UTRs and IGSs were defined/distinguished based on an arbitrary cutoff of 2 kb from annotated coding sequences.

| Chrom | Position | Strand | Gene/Location         | Reference | Alternative | Coverage | Edited (%) | Mean Quality |
|-------|----------|--------|-----------------------|-----------|-------------|----------|------------|--------------|
| 1     | 132088   | +      | 3UTR-cob              | T         | A           | 4327     | 27.34      | 32.01        |
| 8     | 93669    | +      | 5UTR-nad2             | A         | C           | 252      | 41.67      | 32.77        |
| 11    | 95250    | +      | Intron-nad4           | G         | C           | 1137     | 55.50      | 11.70        |
| 21    | 23158    | +      | Intron/IGS-nad5-exon3 | T         | C           | 4171     | 59.89      | 38.43        |
| 21    | 23177    | +      | Intron/IGS-nad5-exon3 | G         | A           | 3791     | 56.98      | 38.97        |
| 21    | 23220    | +      | Intron/IGS-nad5-exon3 | A         | T           | 3896     | 53.85      | 36.18        |
| 33    | 29936    | -      | IGS                   | A         | G           | 599      | 31.89      | 34.12        |
| 33    | 29937    | -      | IGS                   | T         | C           | 599      | 31.89      | 34.12        |
| 36    | 33691    | +      | 3UTR-nad3             | T         | A           | 652      | 20.09      | 31.76        |
| 41    | 31418    | +      | IGS                   | T         | C           | 4137     | 59.71      | 38.39        |
| 41    | 31437    | +      | IGS                   | G         | A           | 3766     | 56.72      | 38.73        |
| 41    | 31480    | +      | IGS                   | A         | T           | 3808     | 52.76      | 35.93        |
| 47    | 48342    | -      | 3UTR-rps3             | A         | T           | 1393     | 36.47      | 32.29        |
| 55    | 1593     | -      | 3UTR-nad3             | A         | T           | 308      | 37.66      | 31.22        |

**Table S6.** Comparison of identified RNA editing sites in protein-coding genes to previous analysis of RNA editing in another *Silene noctiflora* population by Sloan et al. (2010)

| Chrom | Position | Strand | Gene <sup>a</sup> | Coverage | Edited (%) | Mean Quality | 2010 Study |
|-------|----------|--------|-------------------|----------|------------|--------------|------------|
| 1     | 128225   | +      | ccmB              | 706      | 99.43      | 37.47        | Y          |
| 1     | 128267   | +      | ccmB              | 564      | 96.81      | 38.22        | Y          |
| 1     | 128268   | +      | ccmB              | 564      | 96.81      | 38.22        | Y          |
| 1     | 128351   | +      | ccmB              | 165      | 97.58      | 34.52        | Y          |
| 1     | 128357   | +      | ccmB              | 212      | 88.68      | 33.59        | Y          |
| 1     | 128361   | +      | ccmB              | 262      | 95.80      | 33.51        | Y          |
| 1     | 128501   | +      | ccmB              | 523      | 99.43      | 38.01        | Y          |
| 1     | 128664   | +      | ccmB              | 898      | 97.22      | 39.00        | Y          |
| 1     | 128691   | +      | ccmB              | 550      | 97.82      | 35.72        | Y          |
| 1     | 128700   | +      | ccmB              | 269      | 82.90      | 36.77        | Y          |
| 1     | 129165   | +      | rpl5              | 9124     | 91.98      | 37.80        | Y          |
| 1     | 129194   | +      | rpl5              | 9213     | 92.79      | 37.72        | Y          |
| 1     | 129474   | +      | rpl5              | 3879     | 94.10      | 37.45        | Y          |
| 1     | 129660   | +      | rpl5              | 27632    | 90.88      | 37.09        | Y          |
| 1     | 131199   | +      | cob               | 31293    | 98.68      | 38.23        | Y          |
| 1     | 131232   | +      | cob               | 19165    | 98.89      | 35.69        | Y          |
| 1     | 131442   | +      | cob               | 26100    | 99.49      | 39.05        | Y          |
| 1     | 131682   | +      | cob               | 8374     | 98.88      | 34.89        | Y          |
| 1     | 131782   | +      | cob               | 35816    | 98.30      | 37.57        | Y          |
| 1     | 132034   | +      | cob               | 126110   | 99.76      | 39.22        | Y          |
| 2     | 111595   | -      | ccmFc             | 6047     | 99.67      | 38.14        | Y          |
| 2     | 111669   | -      | ccmFc             | 8243     | 98.11      | 36.99        | Y          |
| 2     | 113335   | -      | ccmFc             | 3976     | 99.57      | 36.29        | Y          |
| 2     | 113598   | -      | ccmFc             | 3832     | 91.73      | 37.40        | Y          |
| 2     | 113602   | -      | ccmFc             | 3745     | 99.23      | 36.97        | Y          |
| 2     | 113630   | -      | ccmFc             | 2659     | 87.89      | 38.15        | Y          |
| 2     | 113703   | -      | ccmFc             | 3529     | 98.07      | 35.43        | Y          |
| 3     | 87856    | +      | nad1-3            | 10633    | 95.60      | 36.20        | Y          |
| 3     | 87866    | +      | nad1-3            | 15401    | 89.76      | 36.19        | Y          |
| 3     | 87902    | +      | nad1-3            | 30676    | 94.51      | 36.47        | Y          |
| 4     | 85458    | +      | nad5-1            | 10696    | 97.09      | 36.64        | Y          |
| 4     | 86410    | +      | nad5-2            | 19807    | 98.91      | 37.30        | Y          |
| 4     | 86542    | +      | nad5-2            | 24318    | 99.41      | 38.29        | Y          |
| 4     | 86566    | +      | nad5-2            | 33424    | 99.48      | 36.64        | Y          |
| 4     | 86716    | +      | nad5-2            | 21415    | 97.48      | 36.83        | Y          |
| 4     | 86721    | +      | nad5-2            | 23496    | 96.87      | 36.55        | Y          |
| 4     | 86776    | +      | nad5-2            | 26054    | 99.52      | 38.23        | Y          |
| 4     | 86893    | +      | nad5-2            | 30369    | 98.75      | 33.81        | Y          |
| 4     | 87003    | +      | nad5-2            | 37968    | 99.59      | 35.59        | Y          |
| 4     | 87478    | +      | nad5-2            | 65369    | 99.62      | 36.17        | Y          |
| 6     | 76528    | +      | atp9              | 226140   | 99.00      | 35.90        | Y          |
| 6     | 144066   | -      | nad1-5            | 53836    | 99.24      | 36.74        | Y          |

|    |        |   |        |       |       |       |   |
|----|--------|---|--------|-------|-------|-------|---|
| 6  | 144096 | - | nad1-5 | 30260 | 99.22 | 37.14 | Y |
| 6  | 144251 | - | nad1-5 | 10431 | 97.95 | 34.86 | Y |
| 7  | 38551  | + | nad5-4 | 54499 | 97.68 | 36.78 | Y |
| 7  | 38581  | + | nad5-4 | 92780 | 99.44 | 36.18 | Y |
| 7  | 38611  | + | nad5-4 | 71512 | 99.68 | 37.71 | Y |
| 7  | 39920  | + | nad5-5 | 41655 | 98.84 | 37.03 | Y |
| 7  | 39983  | + | nad5-5 | 69836 | 99.41 | 37.24 | Y |
| 8  | 94380  | + | nad2-1 | 29476 | 93.73 | 37.92 | Y |
| 8  | 95686  | + | nad2-2 | 8556  | 98.14 | 37.51 | Y |
| 8  | 95691  | + | nad2-2 | 8508  | 98.19 | 37.12 | Y |
| 8  | 95724  | + | nad2-2 | 9708  | 96.82 | 35.61 | Y |
| 8  | 95758  | + | nad2-2 | 22091 | 98.37 | 36.32 | Y |
| 8  | 95827  | + | nad2-2 | 23403 | 97.83 | 39.04 | Y |
| 8  | 112014 | + | nad6   | 41731 | 90.94 | 36.82 | Y |
| 8  | 112015 | + | nad6   | 41731 | 90.94 | 36.82 | Y |
| 8  | 112021 | + | nad6   | 40101 | 85.62 | 36.44 | Y |
| 8  | 112072 | + | nad6   | 27070 | 99.60 | 38.48 | Y |
| 8  | 112117 | + | nad6   | 12981 | 99.32 | 36.95 | Y |
| 8  | 112495 | + | nad6   | 38230 | 99.81 | 38.61 | Y |
| 9  | 111015 | - | ccmC   | 14144 | 99.77 | 39.24 | Y |
| 9  | 111038 | - | ccmC   | 14765 | 99.35 | 38.50 | Y |
| 9  | 111074 | - | ccmC   | 8482  | 97.74 | 36.52 | Y |
| 9  | 111112 | - | ccmC   | 7311  | 58.92 | 39.03 | Y |
| 9  | 111189 | - | ccmC   | 4161  | 97.38 | 37.07 | Y |
| 9  | 111214 | - | ccmC   | 3255  | 28.60 | 37.95 | N |
| 9  | 111215 | - | ccmC   | 3255  | 70.08 | 37.56 | Y |
| 9  | 111221 | - | ccmC   | 3284  | 98.29 | 37.71 | Y |
| 9  | 111225 | - | ccmC   | 3896  | 98.64 | 37.48 | Y |
| 9  | 111230 | - | ccmC   | 4074  | 98.50 | 37.64 | Y |
| 9  | 111237 | - | ccmC   | 3815  | 98.32 | 38.26 | Y |
| 9  | 111242 | - | ccmC   | 3725  | 99.25 | 38.49 | Y |
| 9  | 111293 | - | ccmC   | 5003  | 98.96 | 37.34 | Y |
| 9  | 111357 | - | ccmC   | 3271  | 98.14 | 36.05 | Y |
| 9  | 111504 | - | ccmC   | 3977  | 98.42 | 37.34 | Y |
| 9  | 111585 | - | ccmC   | 4296  | 91.29 | 38.00 | Y |
| 10 | 65731  | + | nad9   | 21147 | 98.95 | 35.61 | Y |
| 11 | 94270  | + | nad4-1 | 11376 | 96.83 | 38.28 | Y |
| 11 | 94303  | + | nad4-1 | 16521 | 95.87 | 37.15 | Y |
| 11 | 94354  | + | nad4-1 | 17231 | 96.36 | 37.61 | Y |
| 11 | 94393  | + | nad4-1 | 15488 | 98.55 | 38.11 | Y |
| 11 | 94564  | + | nad4-1 | 11174 | 98.06 | 38.21 | Y |
| 11 | 94629  | + | nad4-1 | 6029  | 87.23 | 37.76 | Y |
| 11 | 94633  | + | nad4-1 | 5933  | 97.39 | 36.59 | Y |
| 11 | 96760  | + | nad4-2 | 16081 | 98.25 | 36.57 | Y |
| 11 | 97105  | + | nad4-2 | 5321  | 98.74 | 39.10 | Y |
| 11 | 98436  | + | nad4-3 | 29316 | 98.96 | 37.12 | Y |

|    |        |   |        |        |       |       |   |
|----|--------|---|--------|--------|-------|-------|---|
| 11 | 98452  | + | nad4-3 | 29492  | 99.22 | 39.18 | Y |
| 23 | 113221 | + | mttB   | 4634   | 92.43 | 37.82 | Y |
| 23 | 113257 | + | mttB   | 6540   | 91.45 | 38.01 | Y |
| 23 | 113288 | + | mttB   | 7884   | 94.91 | 38.24 | Y |
| 23 | 113419 | + | mttB   | 7037   | 95.01 | 35.73 | Y |
| 23 | 113536 | + | mttB   | 10774  | 77.70 | 38.06 | Y |
| 23 | 113564 | + | mttB   | 11805  | 96.31 | 38.55 | Y |
| 23 | 113654 | + | mttB   | 6393   | 96.45 | 37.60 | Y |
| 23 | 113662 | + | mttB   | 5107   | 94.34 | 37.18 | Y |
| 23 | 113767 | + | mttB   | 14684  | 97.49 | 37.50 | Y |
| 23 | 113870 | + | mttB   | 10718  | 98.49 | 37.32 | Y |
| 25 | 70948  | - | cox3   | 46307  | 98.40 | 36.40 | Y |
| 25 | 71684  | - | atp8   | 42085  | 43.32 | 37.69 | Y |
| 25 | 72109  | - | atp8   | 15728  | 96.52 | 36.72 | Y |
| 28 | 12812  | - | nad7-4 | 82769  | 99.83 | 38.53 | Y |
| 28 | 12875  | - | nad7-4 | 44787  | 99.56 | 37.33 | Y |
| 28 | 12890  | - | nad7-4 | 42614  | 99.69 | 37.78 | Y |
| 28 | 13015  | - | nad7-4 | 24931  | 97.83 | 37.18 | Y |
| 28 | 15243  | - | nad7-3 | 22851  | 98.38 | 34.82 | Y |
| 28 | 15274  | - | nad7-3 | 16346  | 99.06 | 37.27 | Y |
| 28 | 15570  | - | nad7-3 | 22927  | 98.92 | 34.49 | Y |
| 28 | 17404  | - | nad7-1 | 11965  | 93.64 | 38.32 | Y |
| 28 | 17443  | - | nad7-1 | 18289  | 92.21 | 36.20 | Y |
| 32 | 53108  | - | matR-a | 11802  | 87.17 | 36.84 | Y |
| 32 | 53149  | - | matR-a | 9387   | 22.13 | 37.23 | N |
| 32 | 53234  | - | matR-a | 7492   | 99.05 | 36.89 | Y |
| 32 | 53755  | - | matR-a | 4574   | 60.14 | 38.04 | Y |
| 32 | 54058  | - | matR-a | 3155   | 23.87 | 36.12 | N |
| 32 | 54653  | - | matR-a | 2628   | 96.00 | 37.55 | Y |
| 32 | 54786  | - | matR-a | 13973  | 99.11 | 36.49 | Y |
| 32 | 54947  | - | matR-a | 5453   | 61.64 | 36.78 | Y |
| 35 | 36945  | - | nad1-1 | 16693  | 85.86 | 38.00 | Y |
| 35 | 36987  | - | nad1-1 | 14316  | 98.29 | 36.77 | Y |
| 35 | 37250  | - | nad1-1 | 14939  | 66.19 | 38.33 | Y |
| 36 | 33354  | + | nad3-a | 6388   | 71.29 | 37.61 | Y |
| 36 | 33355  | + | nad3-a | 6388   | 22.95 | 37.34 | Y |
| 36 | 33501  | + | nad3-a | 5325   | 95.38 | 38.19 | Y |
| 36 | 33508  | + | nad3-a | 5207   | 89.32 | 38.71 | Y |
| 36 | 33642  | + | nad3-a | 7891   | 95.46 | 39.37 | Y |
| 39 | 49370  | - | atp6   | 112502 | 99.83 | 39.42 | Y |
| 39 | 49424  | - | atp6   | 137427 | 99.00 | 36.83 | Y |
| 39 | 49561  | - | atp6   | 54413  | 99.77 | 38.34 | Y |
| 39 | 49625  | - | atp6   | 115223 | 99.52 | 38.26 | Y |
| 39 | 49628  | - | atp6   | 115192 | 99.69 | 38.54 | Y |
| 39 | 49972  | - | atp6   | 95611  | 99.62 | 37.93 | Y |
| 39 | 50051  | - | atp6   | 52075  | 98.85 | 35.73 | Y |

|    |       |   |         |        |       |       |   |
|----|-------|---|---------|--------|-------|-------|---|
| 39 | 50849 | - | atp1    | 38708  | 30.59 | 36.55 | N |
| 46 | 45240 | + | ccmFn   | 1114   | 97.31 | 38.45 | Y |
| 46 | 45285 | + | ccmFn   | 589    | 91.68 | 35.43 | Y |
| 46 | 45443 | + | ccmFn   | 951    | 98.11 | 37.23 | Y |
| 46 | 45666 | + | ccmFn   | 1626   | 41.21 | 36.84 | N |
| 46 | 45843 | + | ccmFn   | 1677   | 98.03 | 36.64 | Y |
| 46 | 45912 | + | ccmFn   | 936    | 99.36 | 36.50 | Y |
| 46 | 45939 | + | ccmFn   | 439    | 99.54 | 33.42 | Y |
| 46 | 46134 | + | ccmFn   | 1255   | 21.67 | 37.45 | N |
| 46 | 46409 | + | ccmFn   | 780    | 99.62 | 38.37 | Y |
| 46 | 46437 | + | ccmFn   | 660    | 98.79 | 36.80 | Y |
| 46 | 46454 | + | ccmFn   | 547    | 98.54 | 35.70 | Y |
| 46 | 46469 | + | ccmFn   | 679    | 98.53 | 35.29 | Y |
| 46 | 46487 | + | ccmFn   | 829    | 98.91 | 37.59 | Y |
| 46 | 46520 | + | ccmFn   | 1146   | 95.20 | 37.95 | Y |
| 46 | 46531 | + | ccmFn   | 1249   | 26.26 | 37.11 | Y |
| 46 | 46538 | + | ccmFn   | 1223   | 98.45 | 38.29 | Y |
| 46 | 46712 | + | ccmFn   | 1651   | 70.62 | 37.31 | Y |
| 47 | 48627 | - | rps3    | 14592  | 98.94 | 37.98 | Y |
| 47 | 48654 | - | rps3    | 9329   | 98.33 | 36.55 | Y |
| 47 | 49248 | - | rps3    | 6181   | 26.84 | 35.14 | N |
| 47 | 49296 | - | rps3    | 4139   | 97.32 | 36.82 | Y |
| 49 | 31208 | + | nad2-3  | 24657  | 30.99 | 37.59 | Y |
| 49 | 33112 | + | nad2-4  | 42441  | 99.53 | 38.69 | Y |
| 49 | 33142 | + | nad2-4  | 45968  | 99.50 | 38.66 | Y |
| 49 | 33146 | + | nad2-4  | 50364  | 98.86 | 38.12 | Y |
| 49 | 33212 | + | nad2-4  | 28309  | 90.66 | 38.43 | Y |
| 49 | 33242 | + | nad2-4  | 34939  | 99.40 | 36.06 | Y |
| 49 | 33311 | + | nad2-4  | 24403  | 99.82 | 38.86 | Y |
| 49 | 33431 | + | nad2-4  | 3982   | 82.92 | 37.04 | Y |
| 49 | 34782 | + | nad2-5  | 154508 | 98.54 | 36.19 | Y |
| 49 | 34785 | + | nad2-5  | 160482 | 99.02 | 35.19 | Y |
| 49 | 34790 | + | nad2-5  | 155520 | 96.19 | 35.51 | Y |
| 55 | 70100 | - | cox2    | 34143  | 99.22 | 37.52 | Y |
| 55 | 70192 | - | cox2    | 27276  | 98.65 | 37.04 | Y |
| 60 | 67379 | - | atp4-a  | 25399  | 99.41 | 36.51 | Y |
| 60 | 67535 | - | atp4-a  | 12301  | 99.57 | 37.72 | Y |
| 60 | 67559 | - | atp4-a  | 15773  | 99.61 | 36.72 | Y |
| 60 | 67571 | - | atp4-a  | 18399  | 99.70 | 37.43 | Y |
| 60 | 67697 | - | atp4-a  | 14692  | 99.72 | 38.35 | Y |
| 60 | 67752 | - | atp4-a  | 11772  | 81.30 | 36.81 | Y |
| 60 | 67944 | - | nad4L-a | 8746   | 98.94 | 38.17 | Y |
| 60 | 68095 | - | nad4L-a | 9427   | 99.41 | 38.12 | Y |
| 60 | 68116 | - | nad4L-a | 8532   | 98.85 | 37.96 | Y |
| 60 | 68131 | - | nad4L-a | 8840   | 99.50 | 38.45 | Y |
| 60 | 68179 | - | nad4L-a | 6910   | 99.57 | 39.14 | Y |

|    |       |   |         |      |       |       |   |
|----|-------|---|---------|------|-------|-------|---|
| 60 | 68224 | - | nad4L-a | 3494 | 88.95 | 38.21 | Y |
| 61 | 6937  | - | nad1-4  | 1887 | 24.54 | 34.45 | Y |

<sup>a</sup>Only a single representative is shown for genes with multiple copies in the genome.

**Table S7.** Summary of RNA editing sites that were previously reported in another *Silene noctiflora* population by Sloan et al. (2010) but not identified by the CLC algorithm at a cutoff of 20% editing frequency

| <b>Chrom</b> | <b>Position</b> | <b>Strand</b> | <b>Gene</b> | <b>Manual Inspection<sup>a</sup></b> |
|--------------|-----------------|---------------|-------------|--------------------------------------|
| 1            | 128208          | +             | ccmB        | Not Edited                           |
| 1            | 128325          | +             | ccmB        | Highly Edited                        |
| 1            | 128345          | +             | ccmB        | Highly Edited                        |
| 1            | 128346          | +             | ccmB        | Highly Edited                        |
| 1            | 128711          | +             | ccmB        | Highly Edited                        |
| 1            | 128748          | +             | ccmB        | Highly Edited                        |
| 1            | 128751          | +             | ccmB        | Highly Edited                        |
| 1            | 128769          | +             | ccmB        | Highly Edited                        |
| 1            | 128793          | +             | ccmB        | Highly Edited                        |
| 2            | 113631          | -             | ccmFc       | Highly Edited                        |
| 23           | 131163          | +             | mttB        | Partially Edited                     |
| 35           | 36944           | -             | nad1-1      | Highly Edited                        |
| 46           | 46583           | +             | ccmFn       | Not Edited                           |
| 49           | 33396           | +             | nad2-4      | Partially Edited                     |

<sup>a</sup>Manual inspection of all mapped RNA-seq reads was used to classify each site: “Highly Edited” indicates >80%; “Partially Edited” indicates <20%; and “Not Edited” indicates no evidence of editing.
